# Supplementary material for: Synthesis of galactofuranosyl-(1 → 5)-thiodisaccharide glycomimetics as inhibitors of a β-d-galactofuranosidase
Source: Royal Society of Chemistry journal article supplement (doi:10.1039/c5ra06899a), 2015-01-01

# Synthesis of galactofuranosyl (1→5)-thiodisaccharide glycomimetics as inhibitors of a β-D-galactofuranosidase

Marcos J. Lo Fiego,<sup>a,b</sup> Carla Marino<sup>a</sup> and Oscar Varela<sup>\*,a</sup>

<sup>a</sup>*CIHIDECAR-CONICET-UBA, Departamento de Química Orgánica, Facultad de Ciencias Exactas y Naturales, Universidad de Buenos Aires, Buenos Aires (1428), Argentina.*

<sup>b</sup>*Present address: INQUISUR-CONICET, Departamento de Química, Universidad Nacional del Sur, Avenida Alem 1253, Bahía Blanca (8000), Argentina.*

## Characterization Data

- ▶ <sup>1</sup>H and <sup>13</sup>C NMR spectra for compounds 5-7, 10-18
- ▶ NOESY spectra for compounds 16 and 18

# <sup>1</sup>H NMR of Compound 5

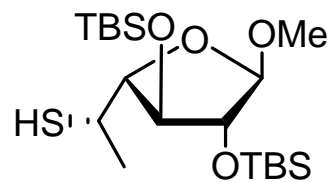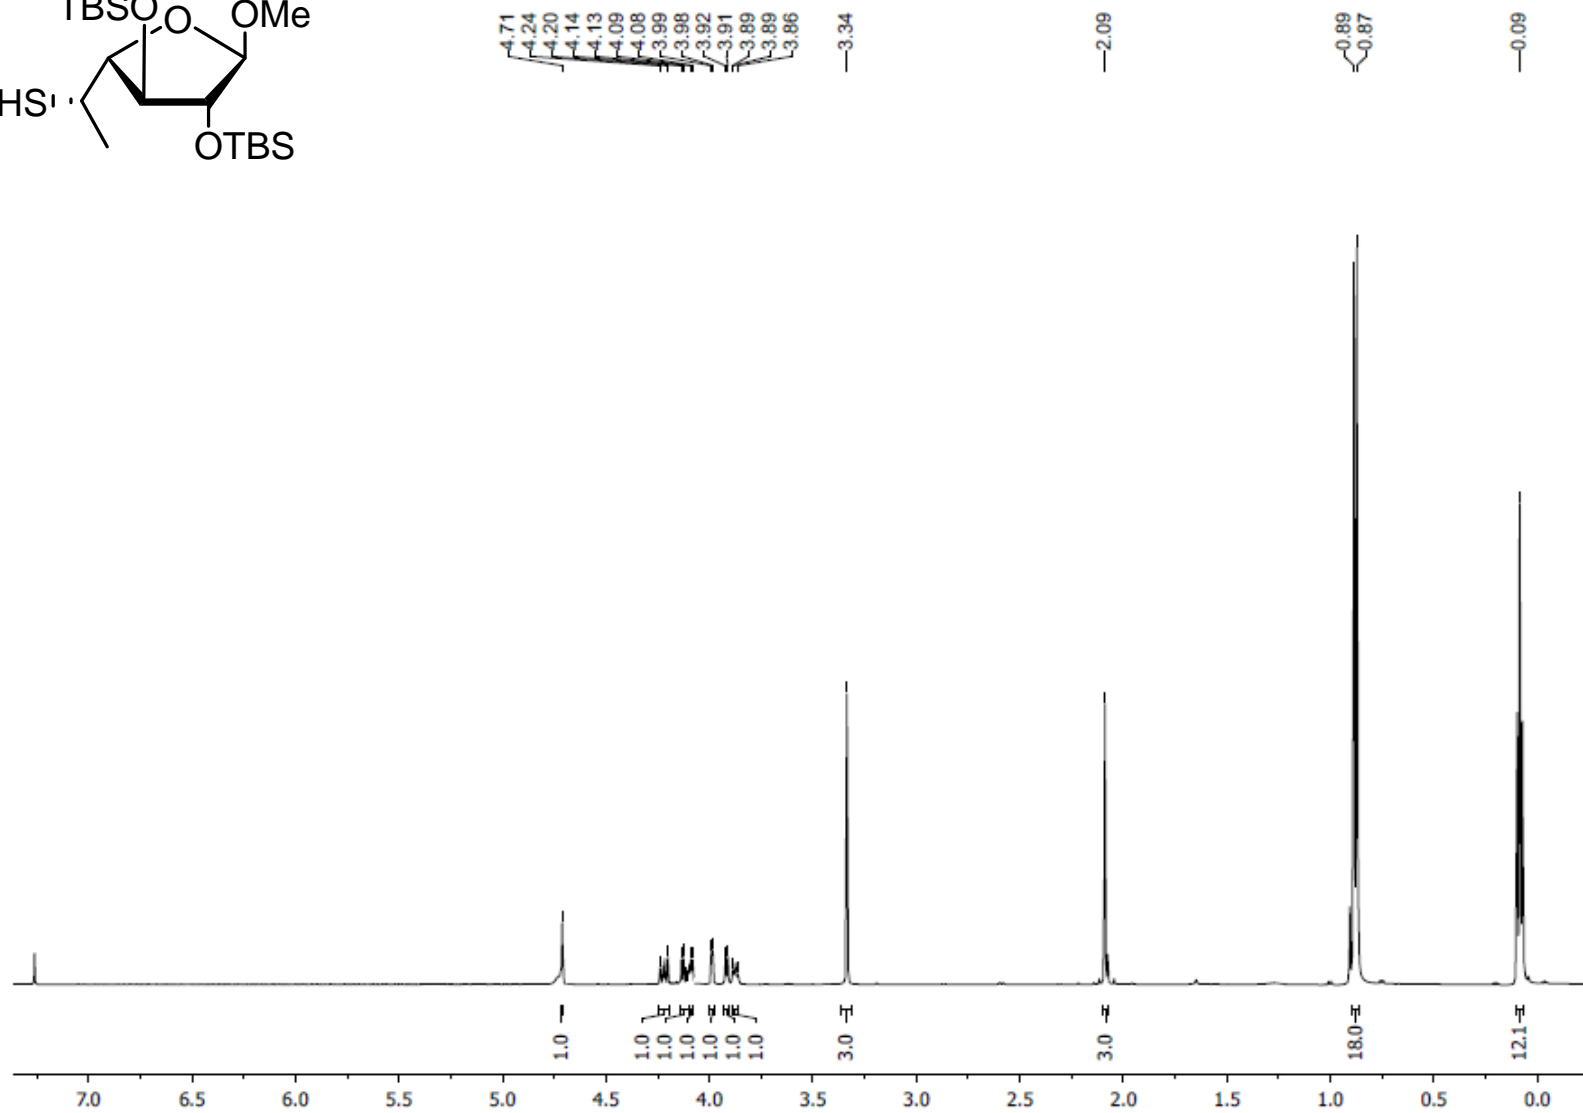

# $^{13}\text{C}$ NMR of Compound 5

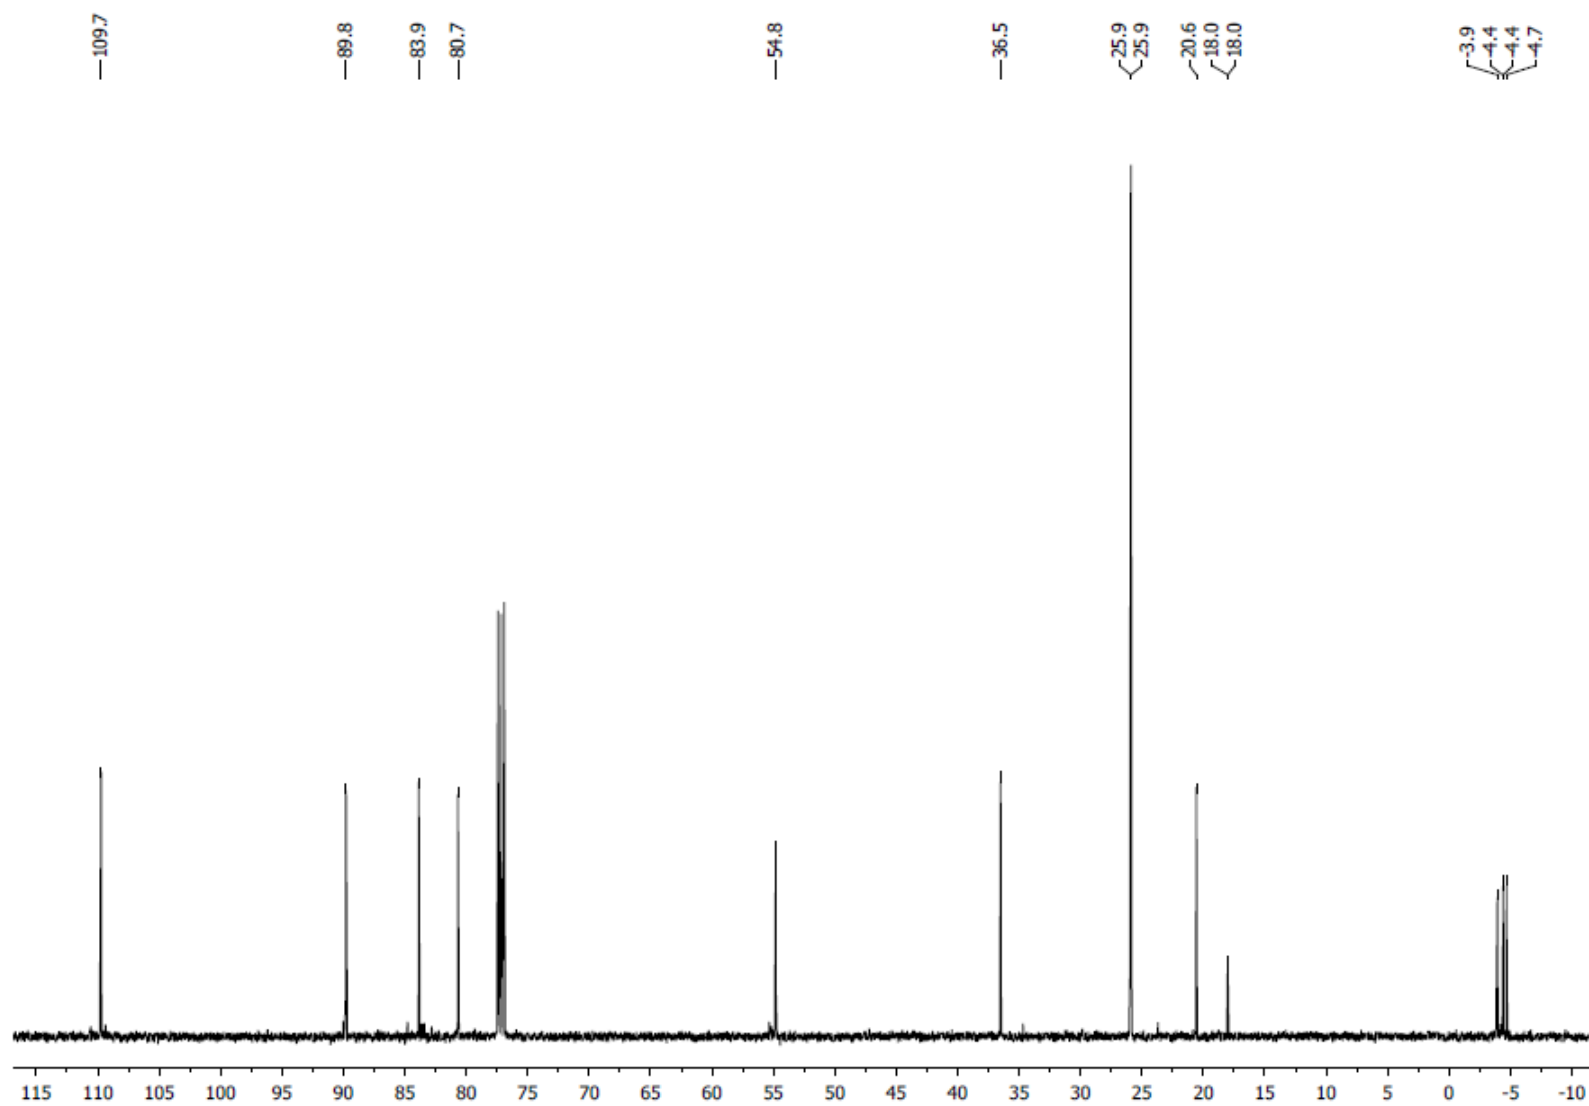

# <sup>1</sup>H RMN of Compound 6

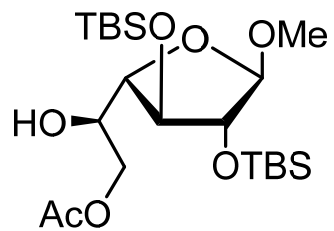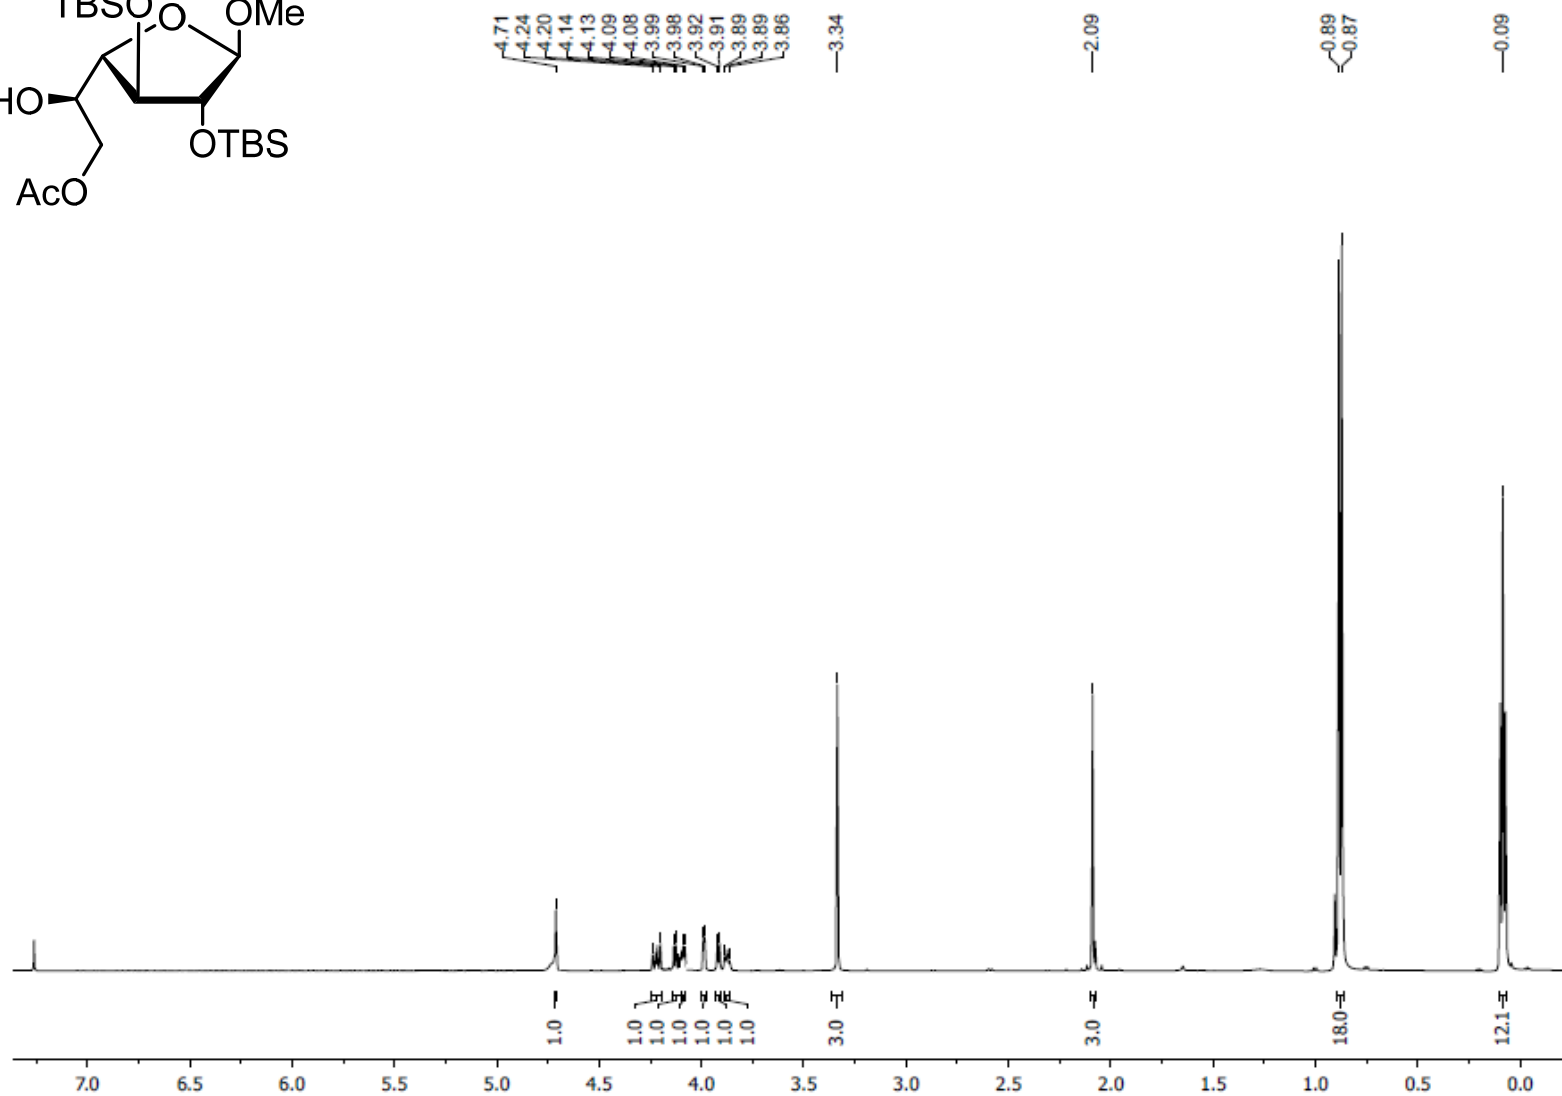

# $^{13}\text{C}$ RMN of Compound 6

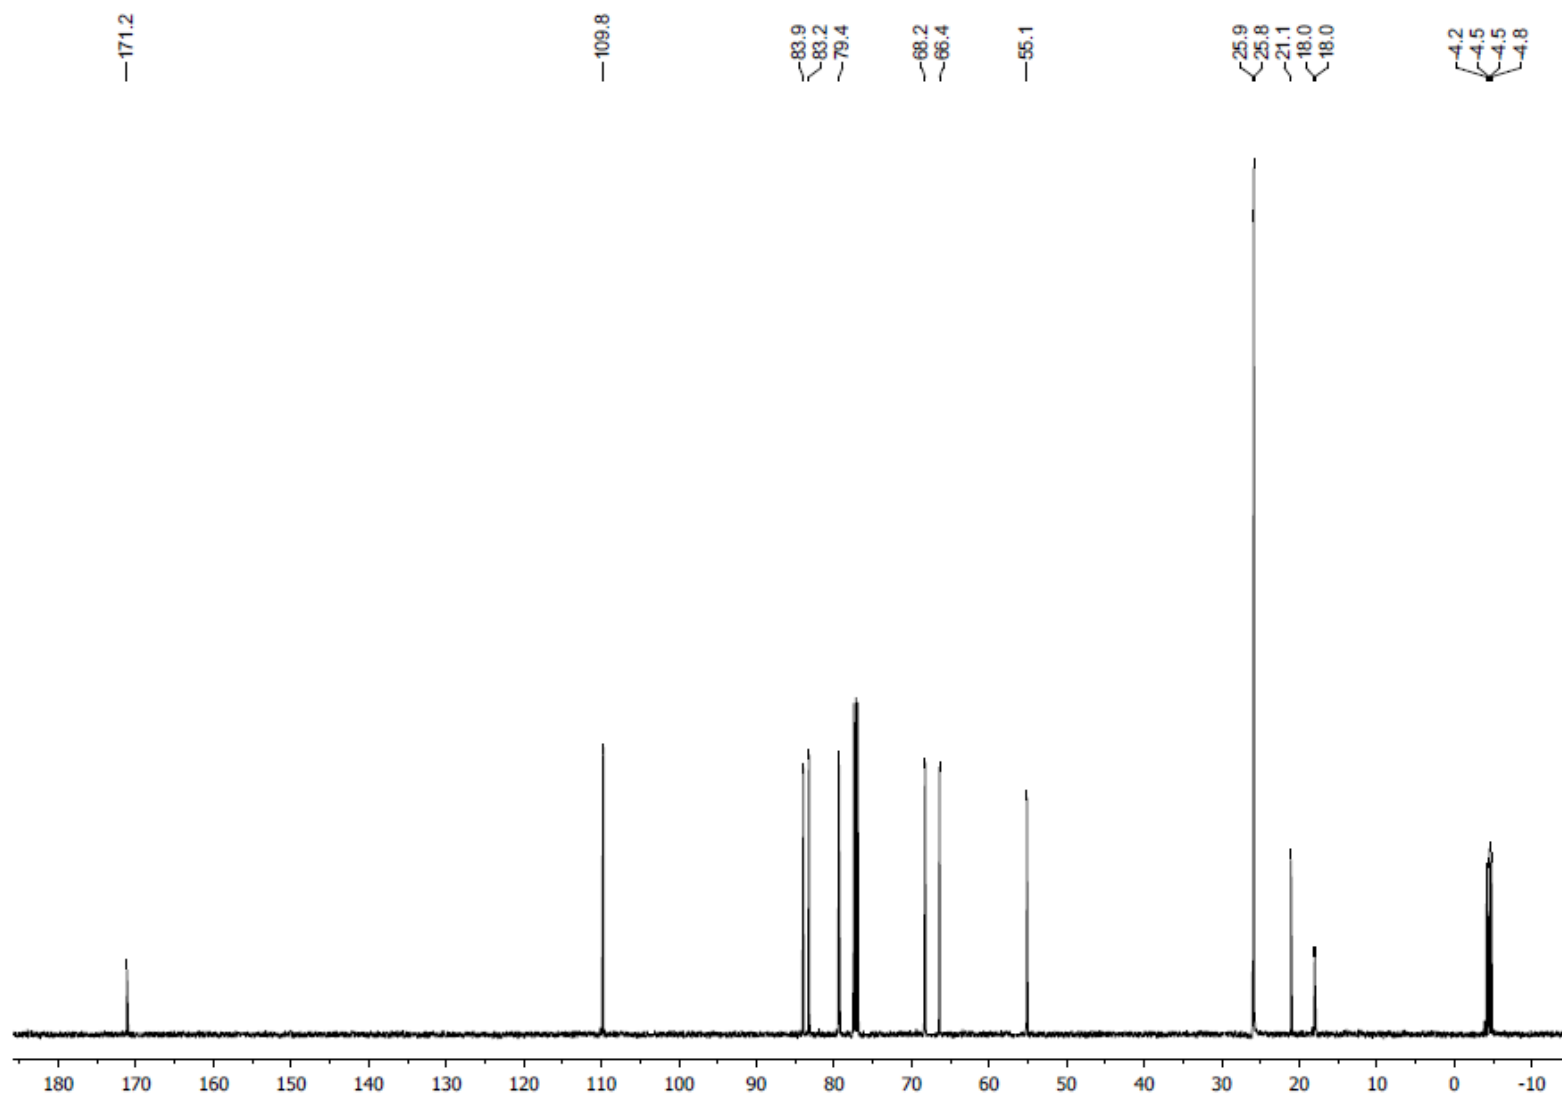

# <sup>1</sup>H RMN of Compound 7

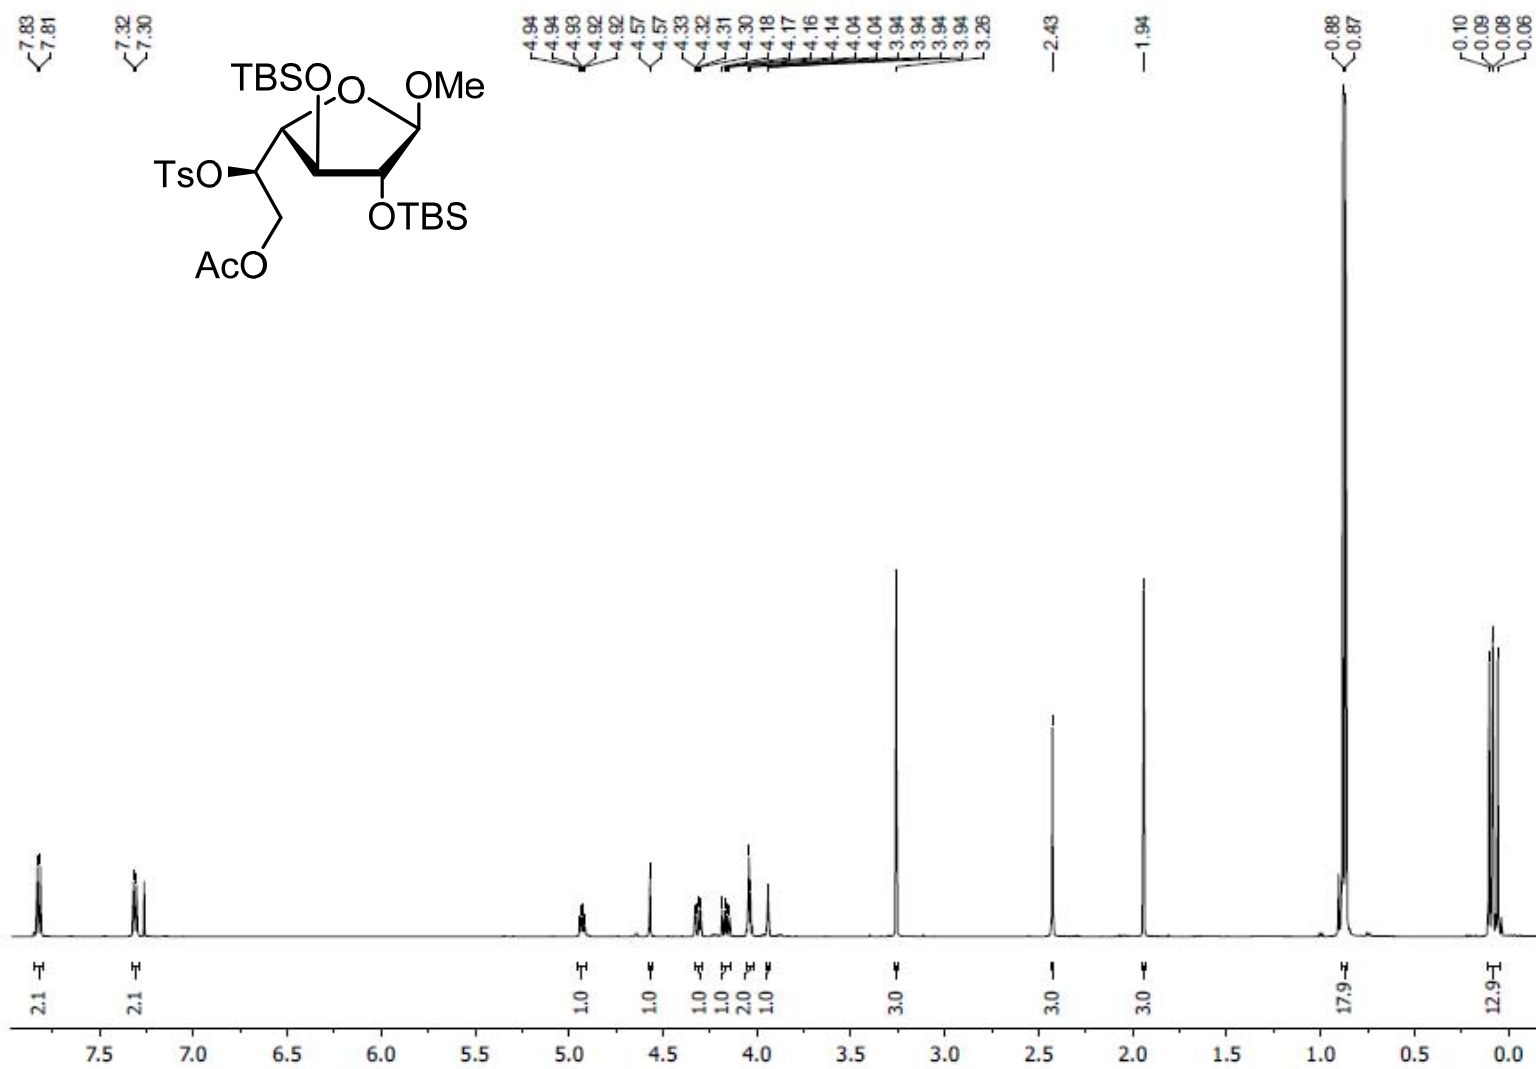

# $^{13}\text{C}$ RMN of Compound 7

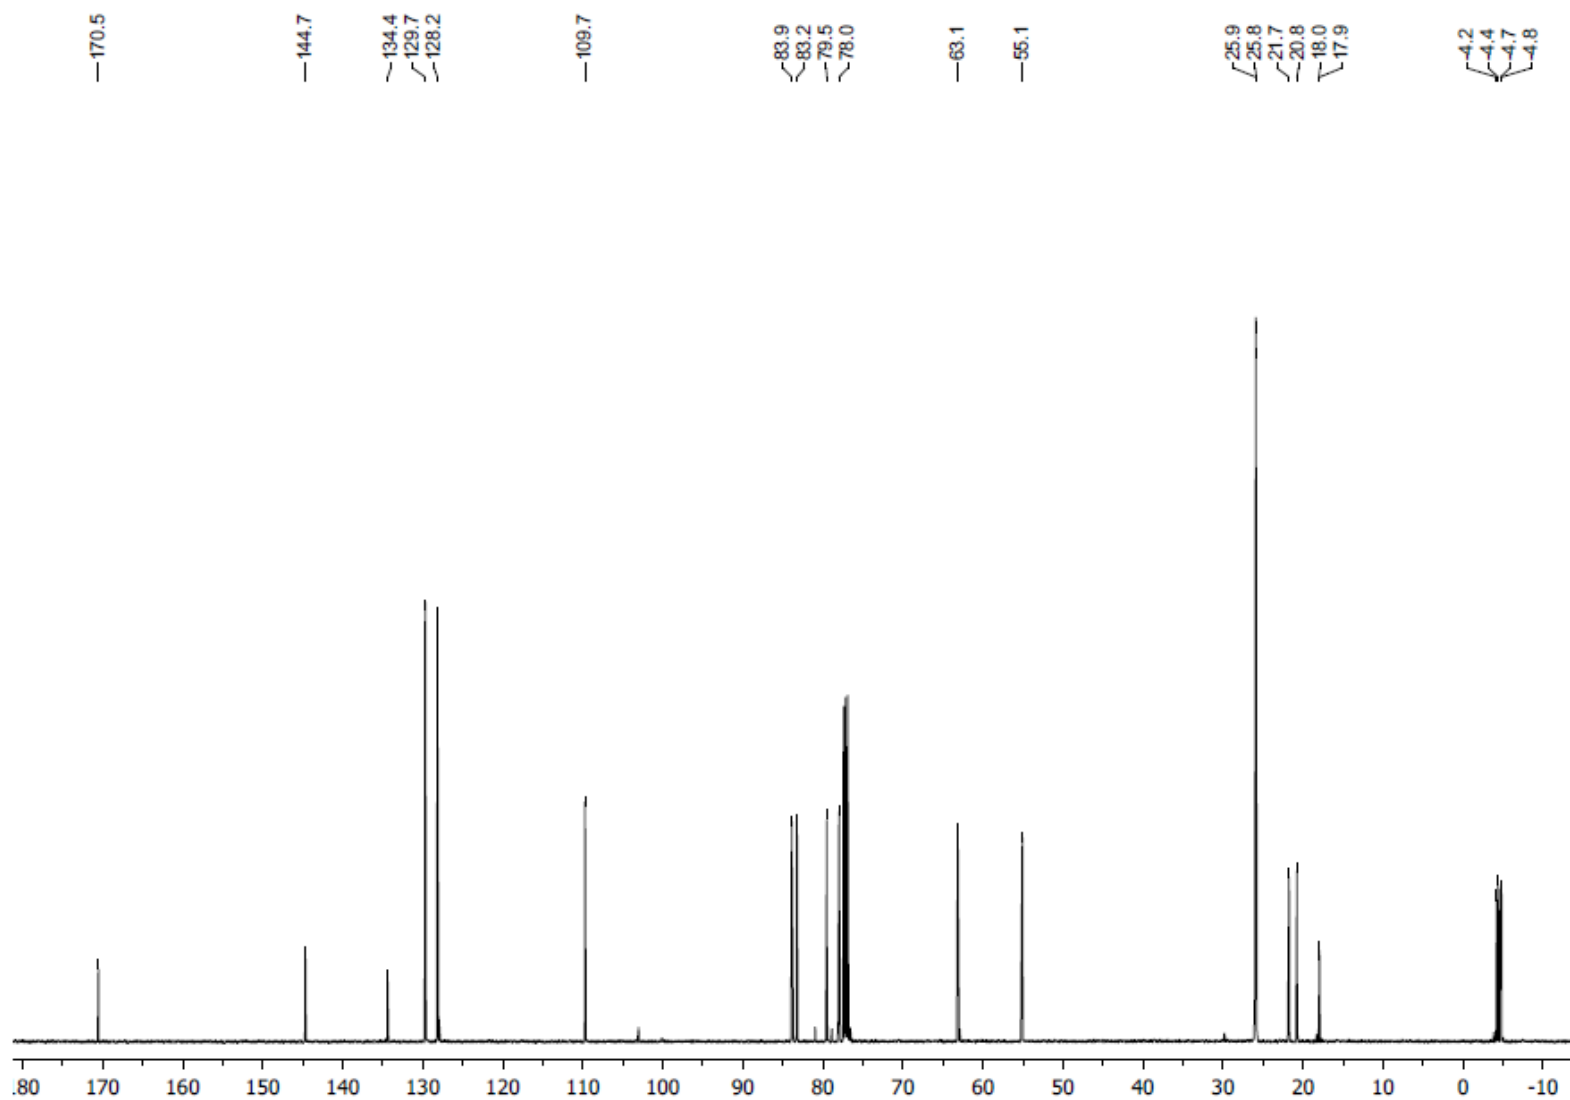

# <sup>1</sup>H RMN of Compound 10

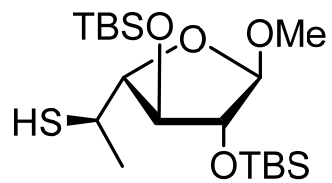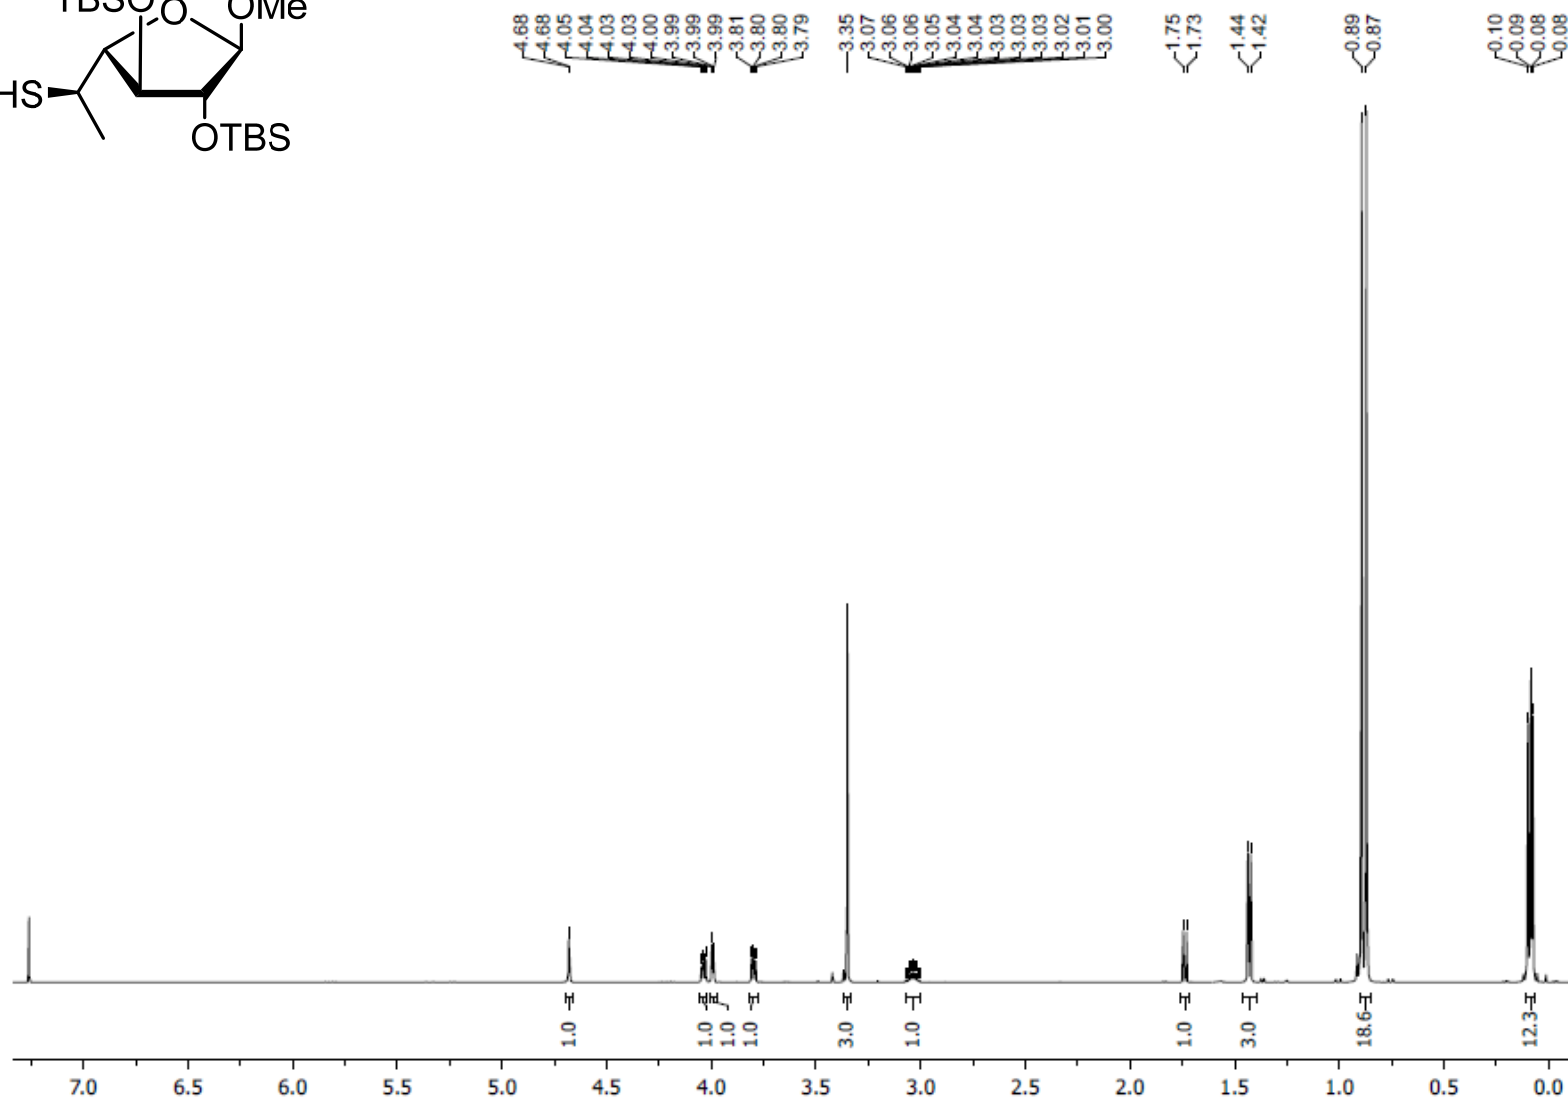



# $^{13}\text{C}$ RMN of Compound 10

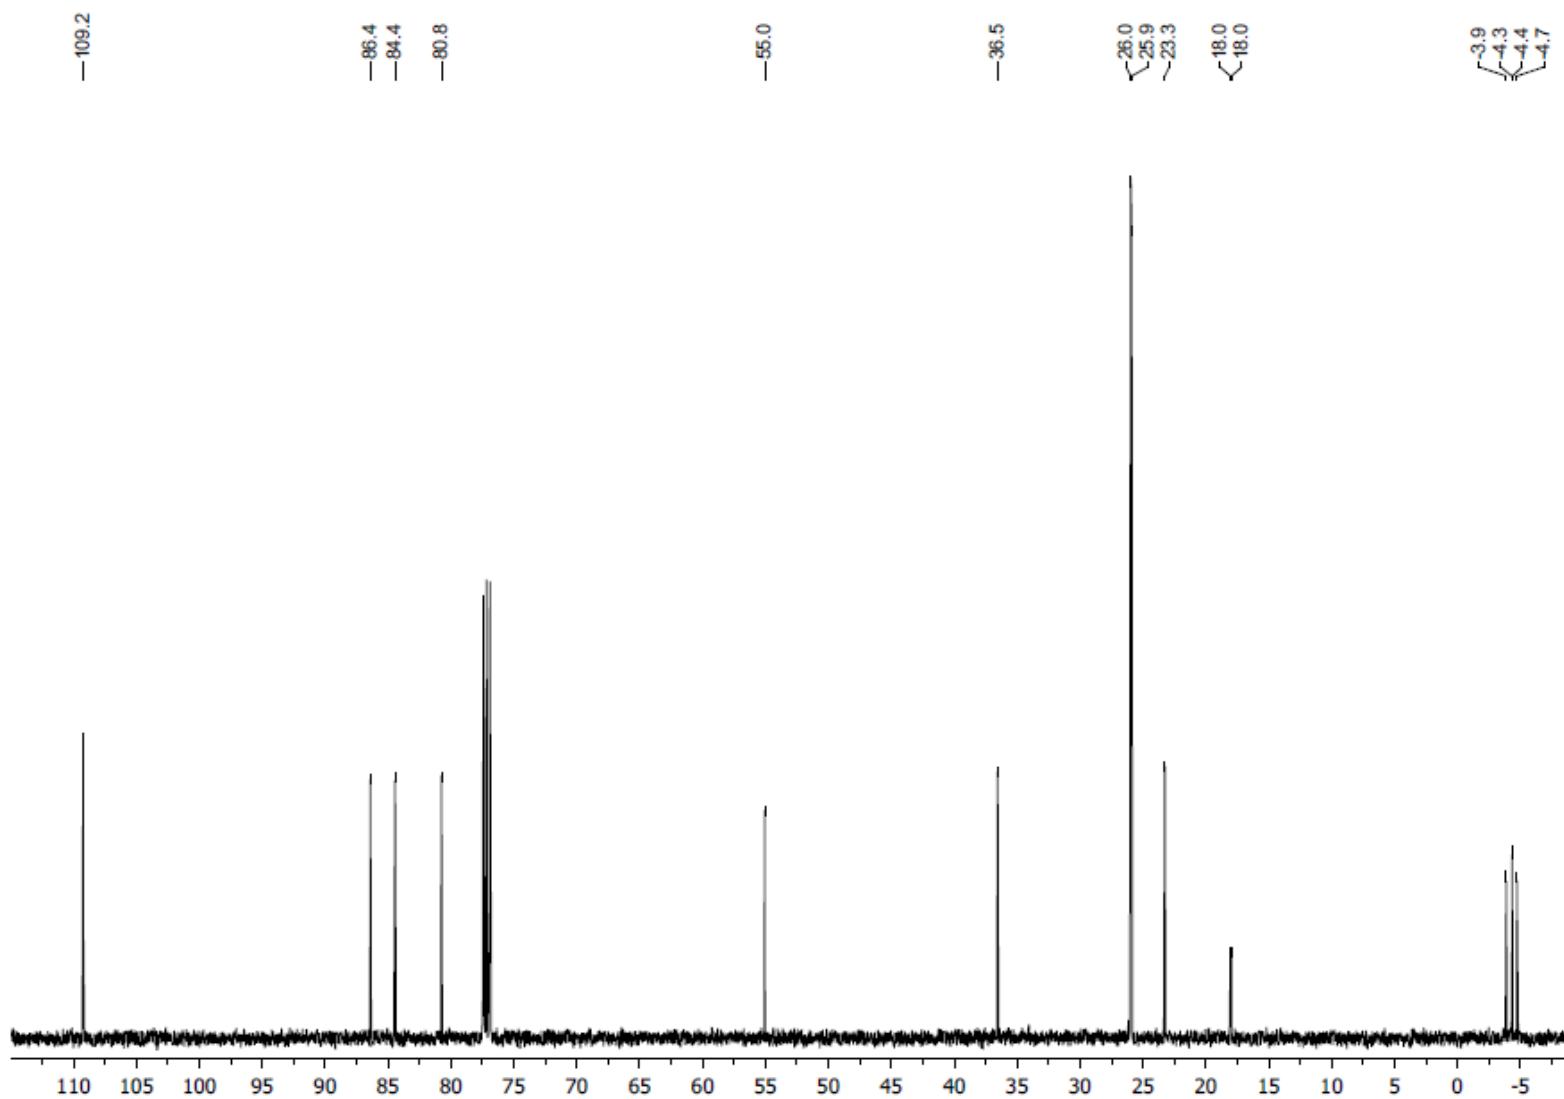

# <sup>1</sup>H RMN of Compound 12

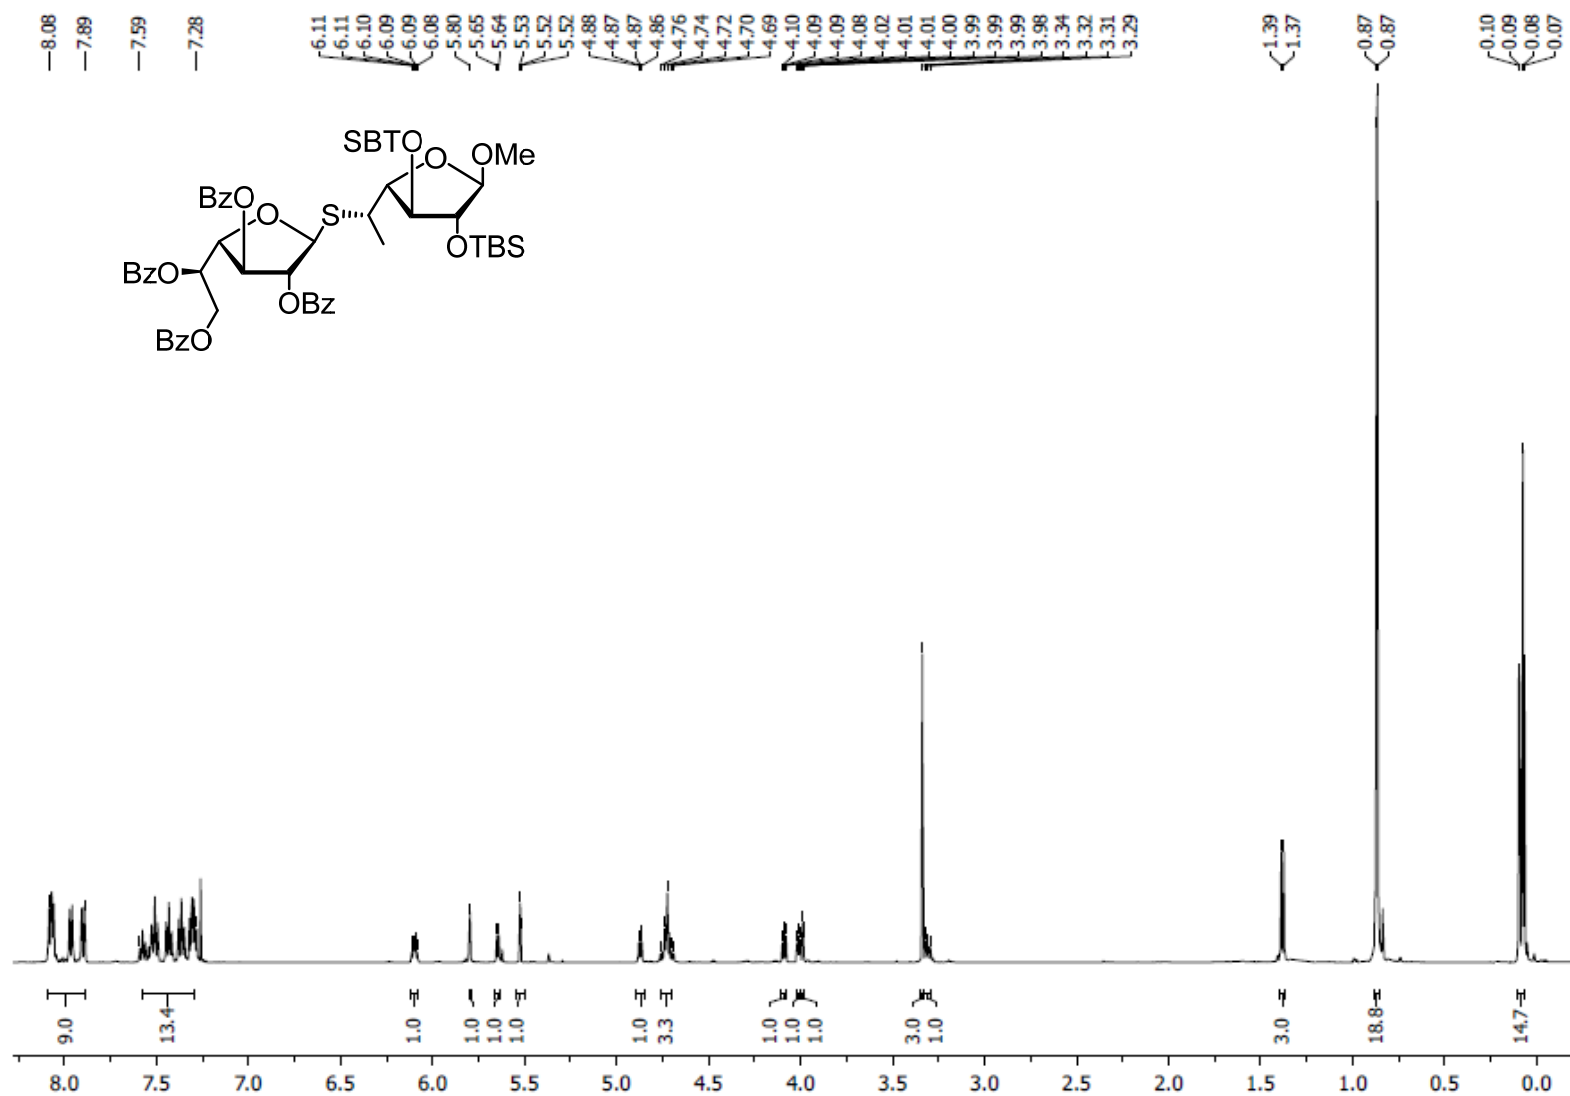

# $^{13}\text{C}$ RMN of Compound 12

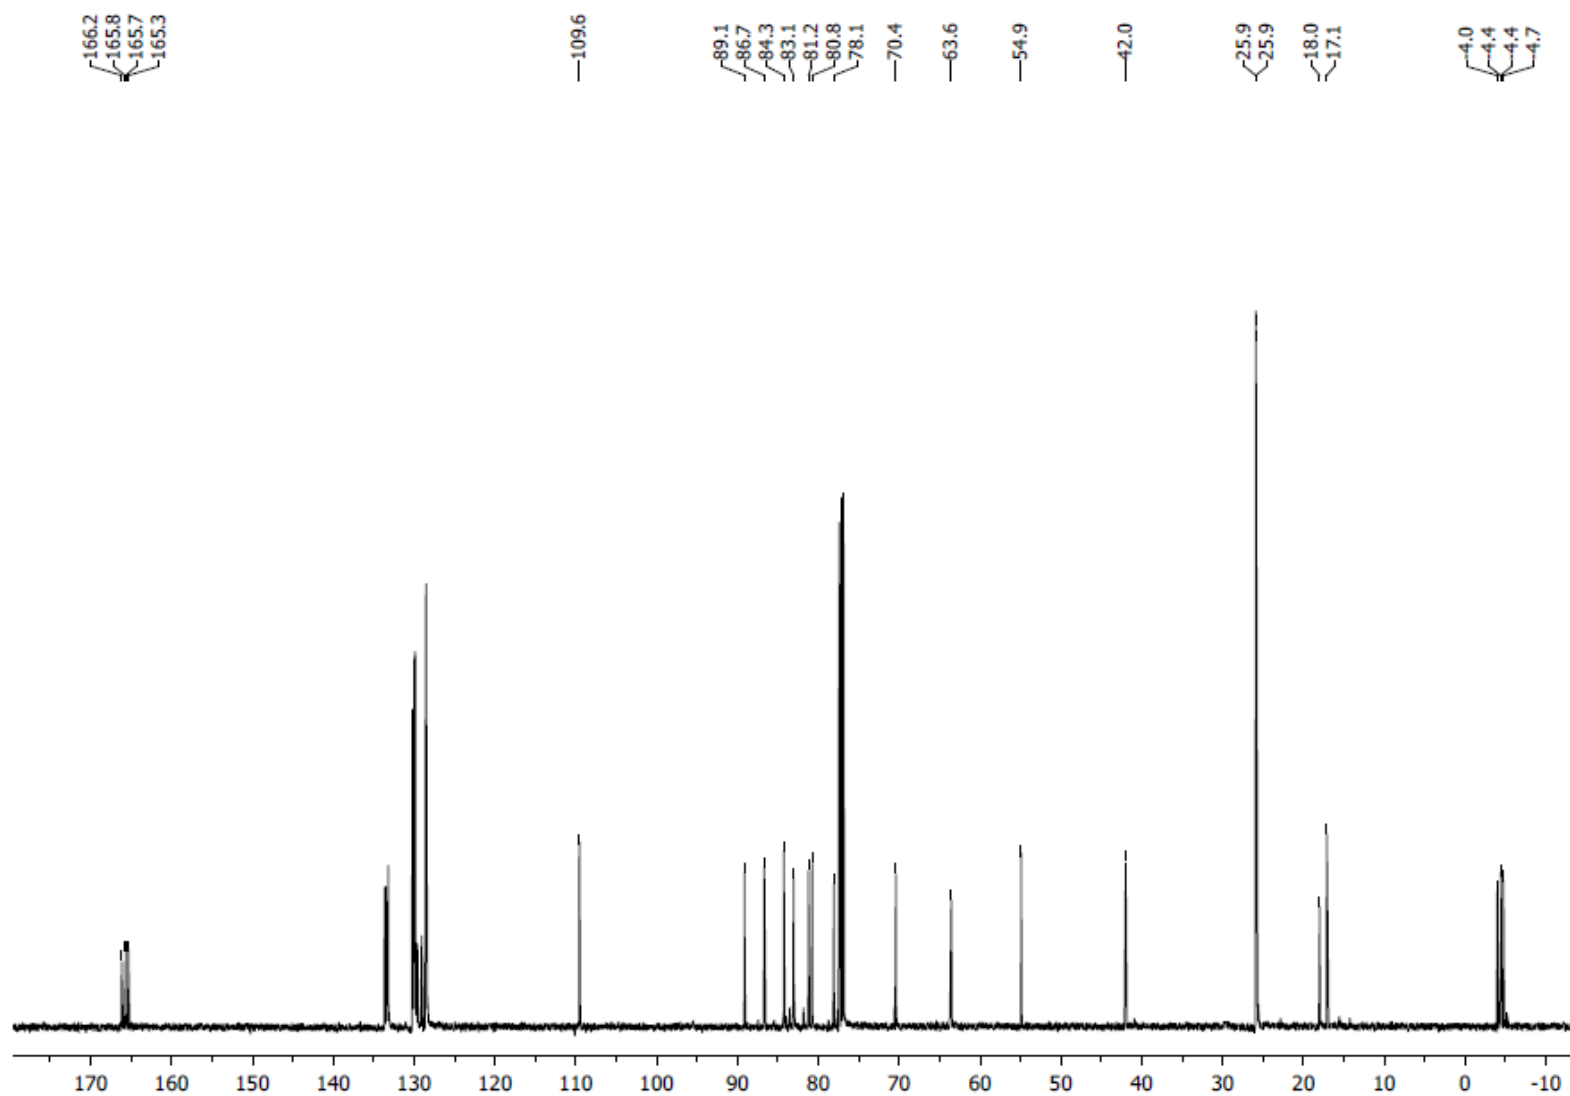

# $^1\text{H}$ RMN of a mixture of Compounds 13a and 13b

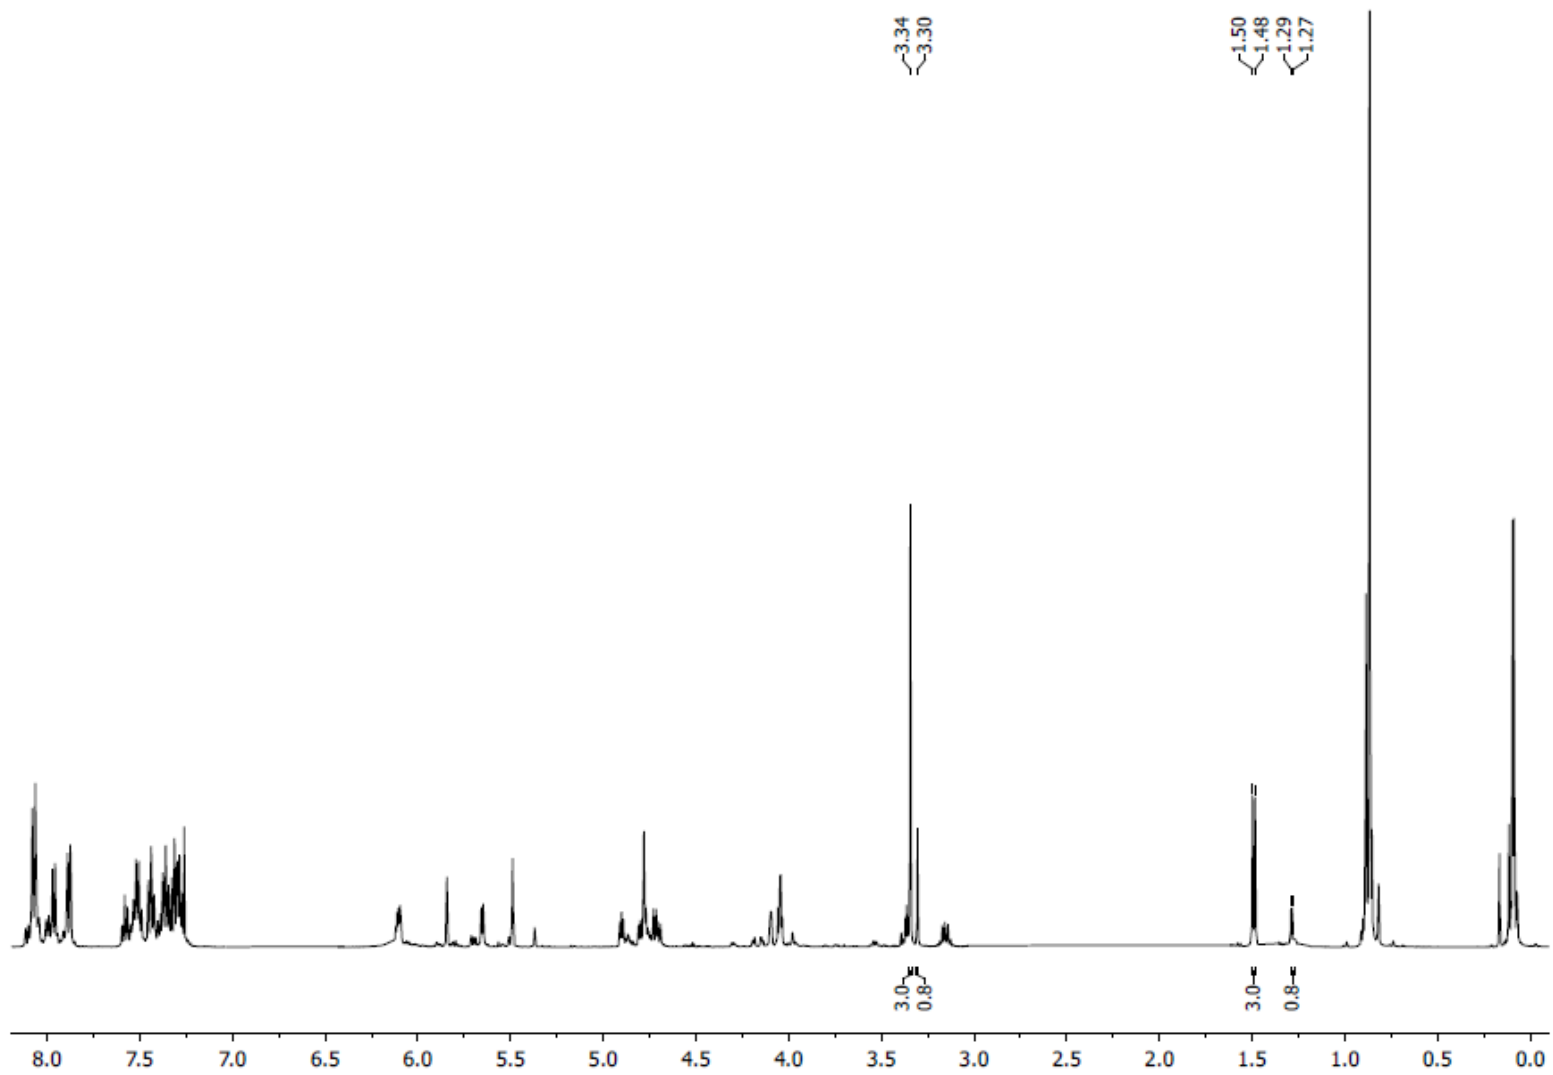

# <sup>13</sup>C RMN of a mixture of Compounds 13a and 13b

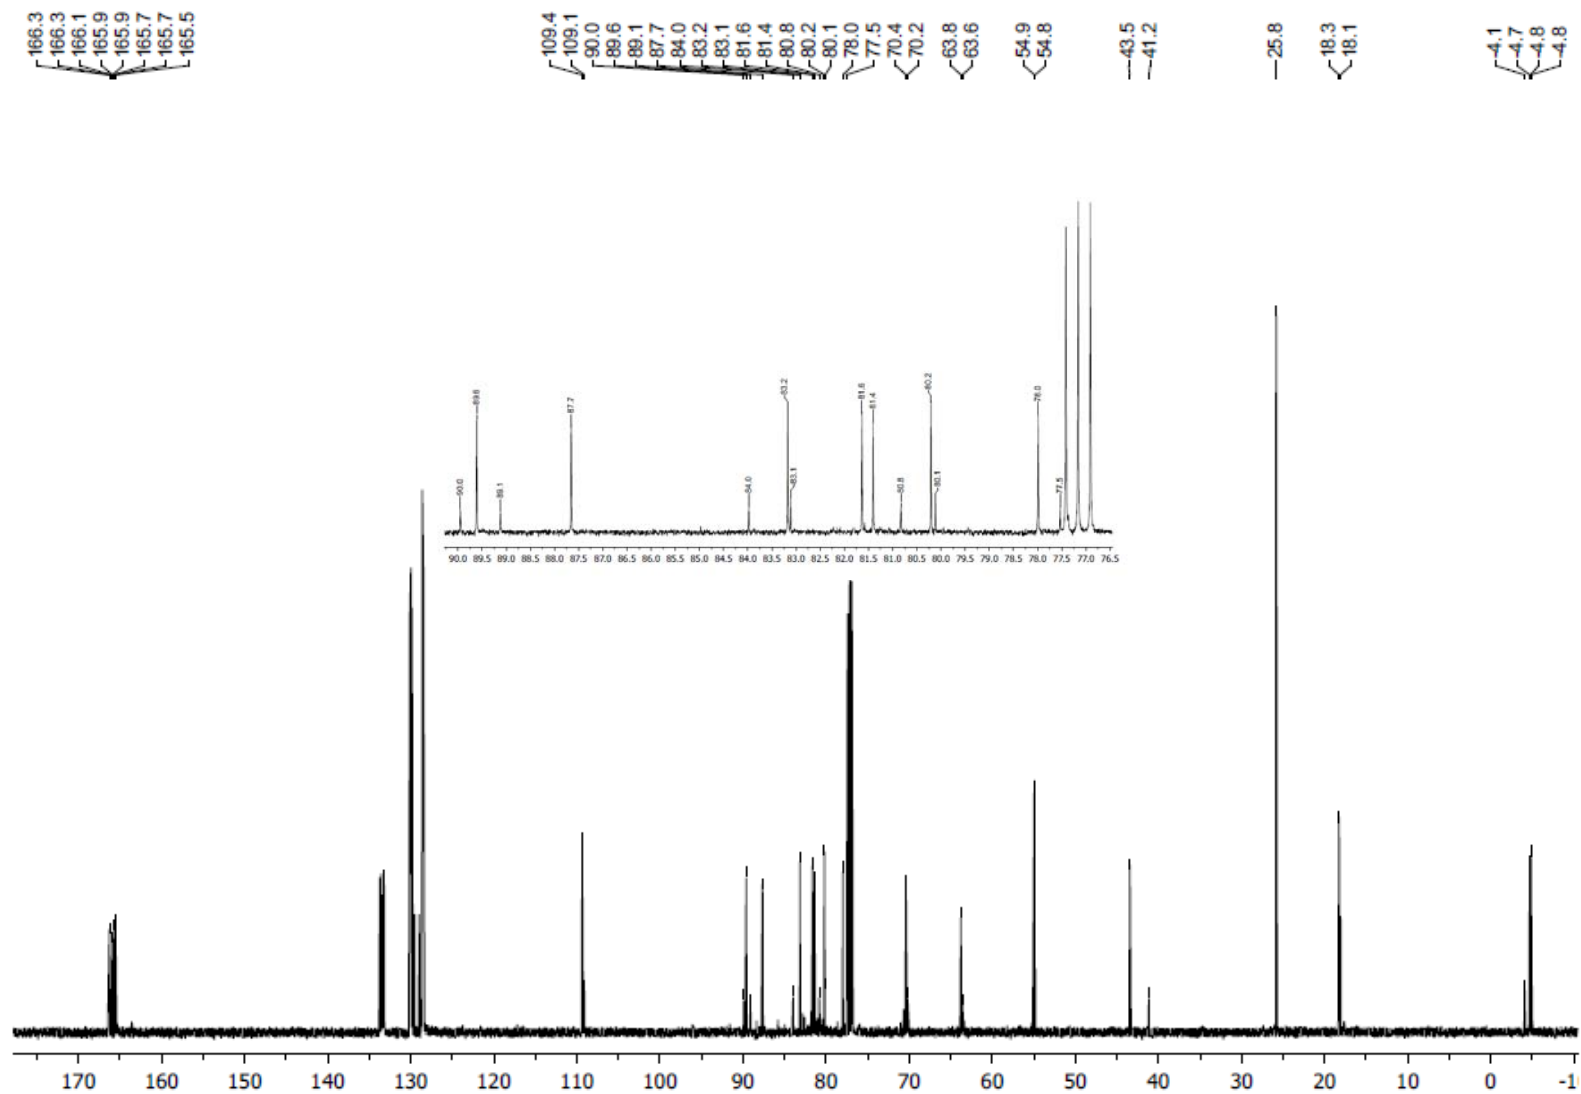



# $^{13}\text{C}$ RMN of Compound 14

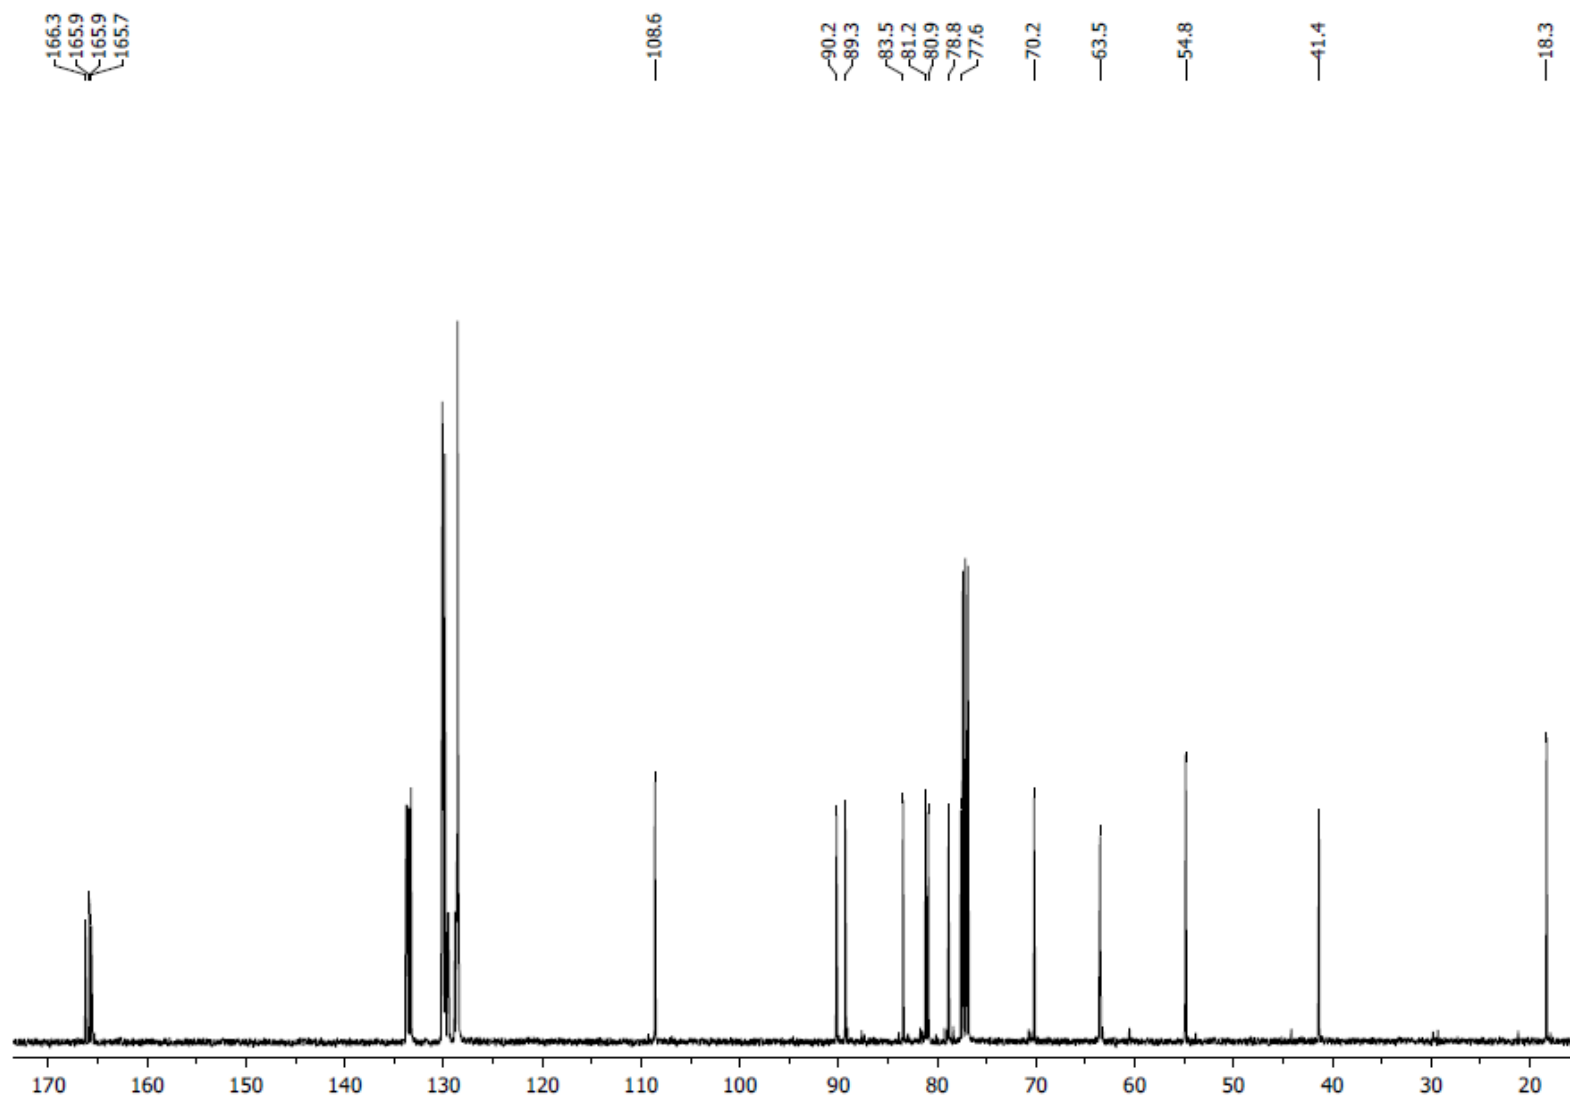

# <sup>1</sup>H RMN of Compound 15

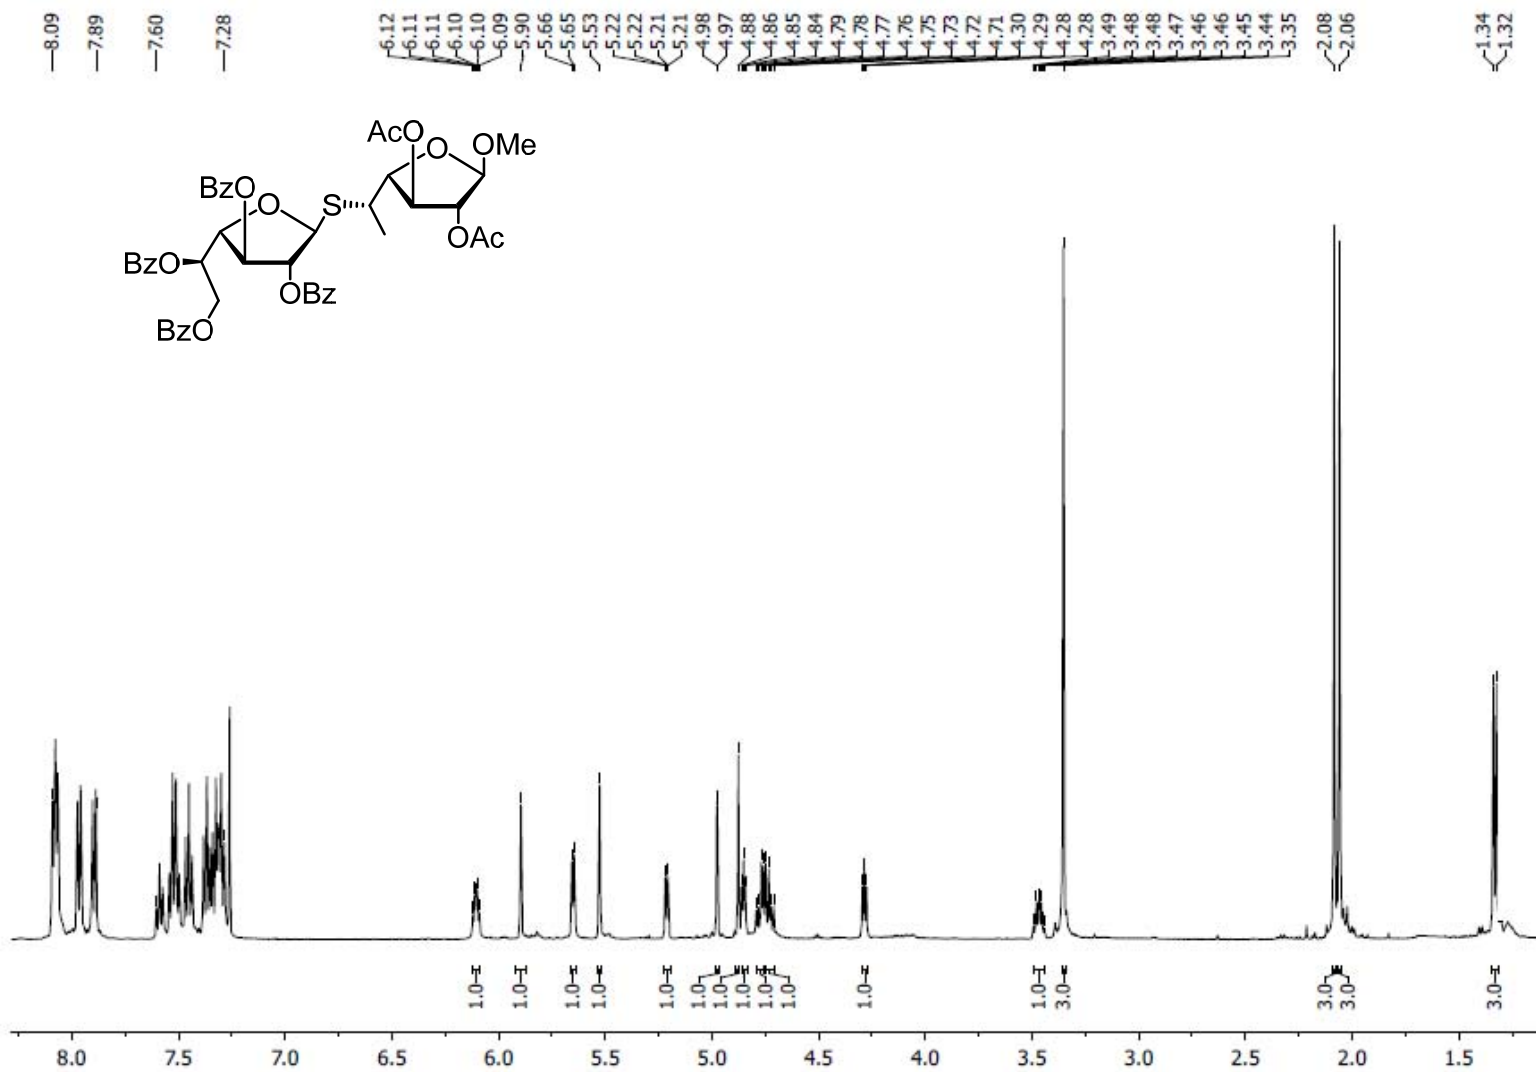



# <sup>13</sup>C RMN of Compound 15

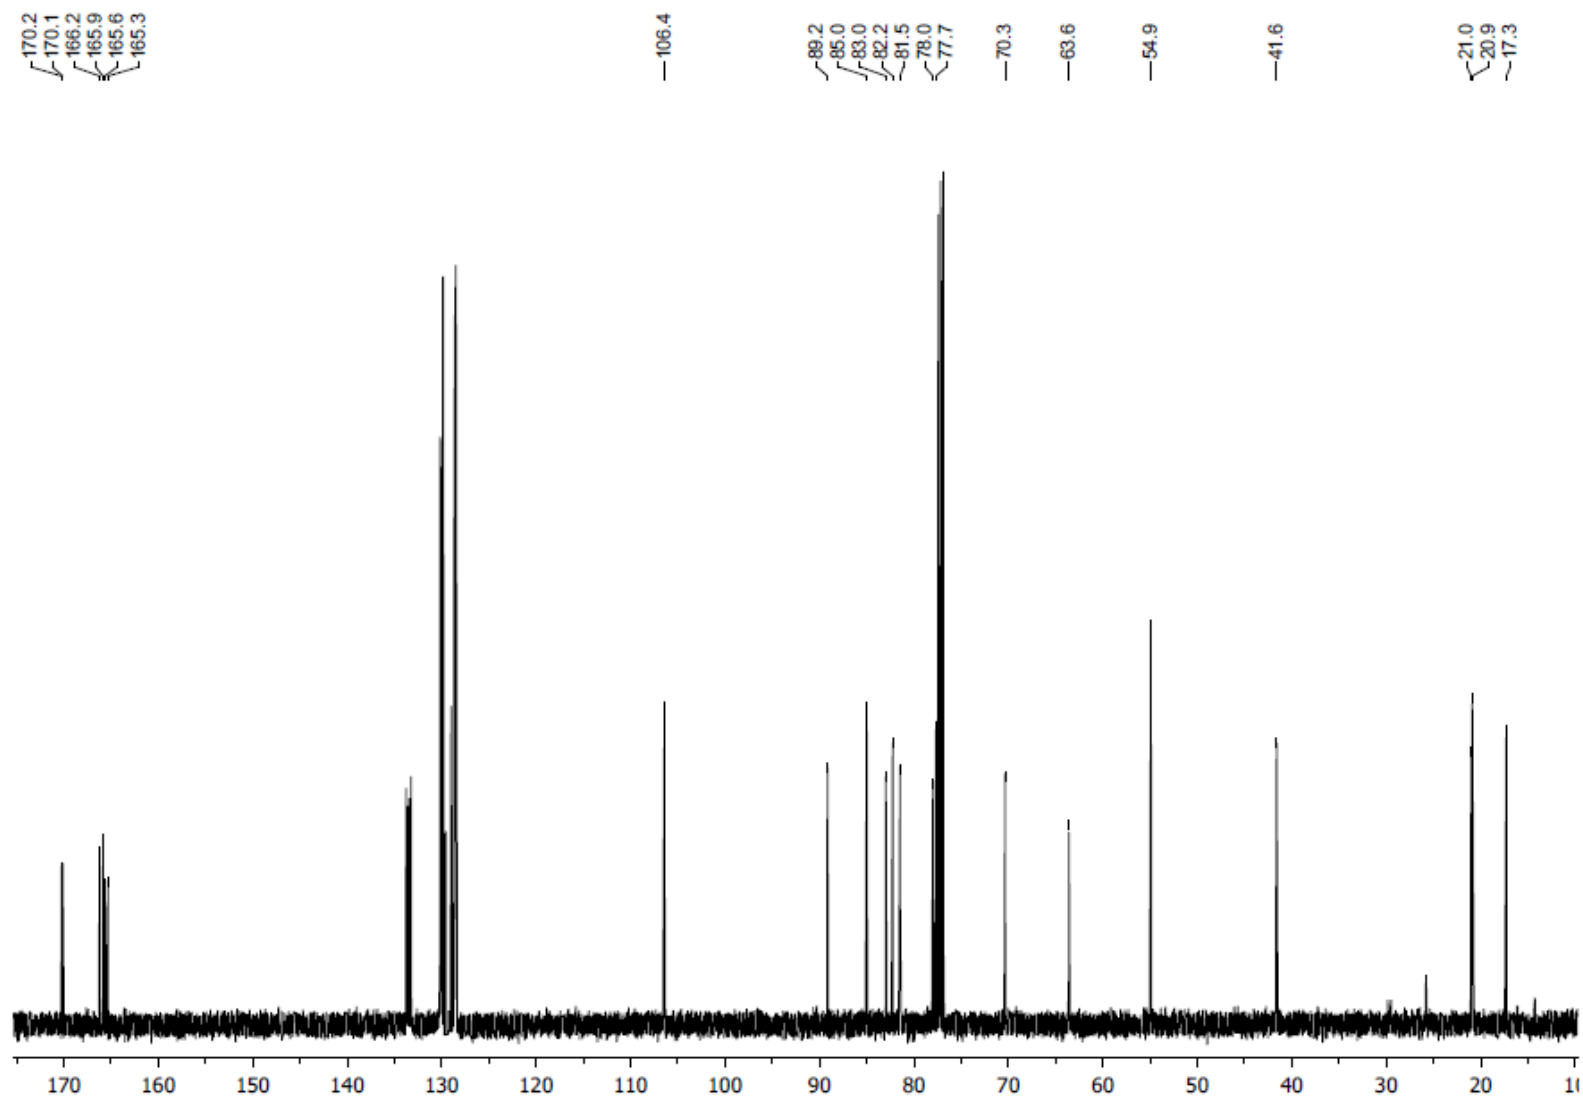

# <sup>1</sup>H RMN of Compound 16

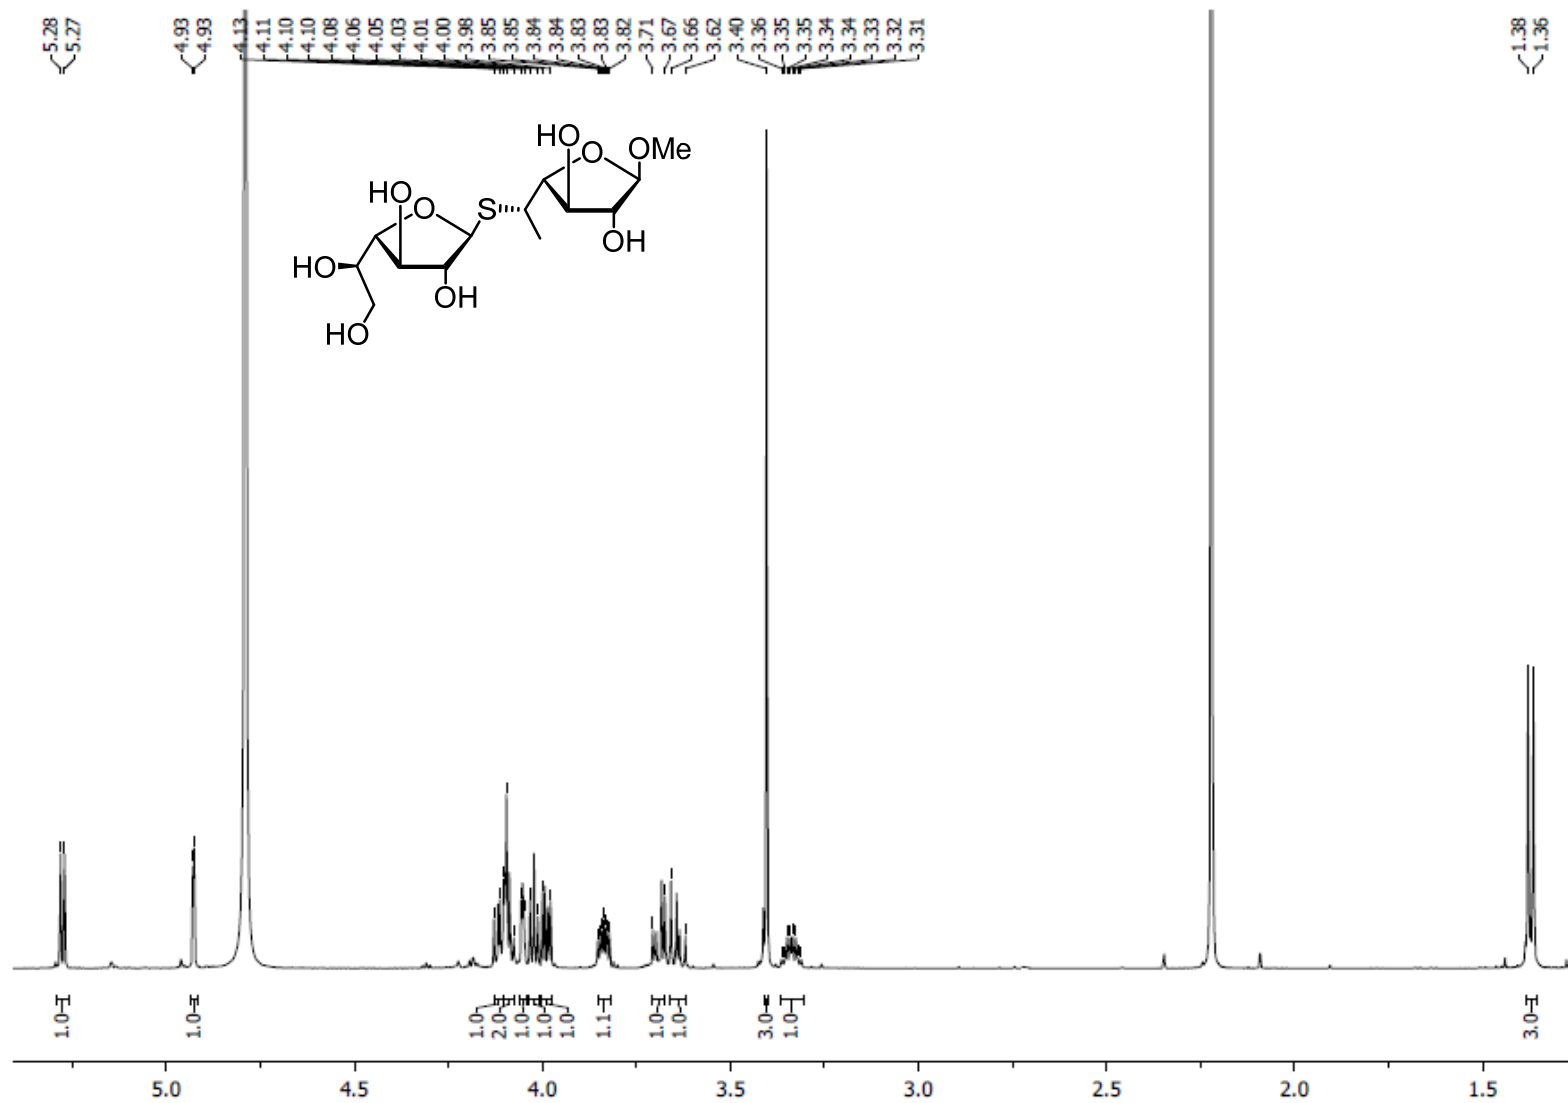

# $^{13}\text{C}$ RMN of Compound 16

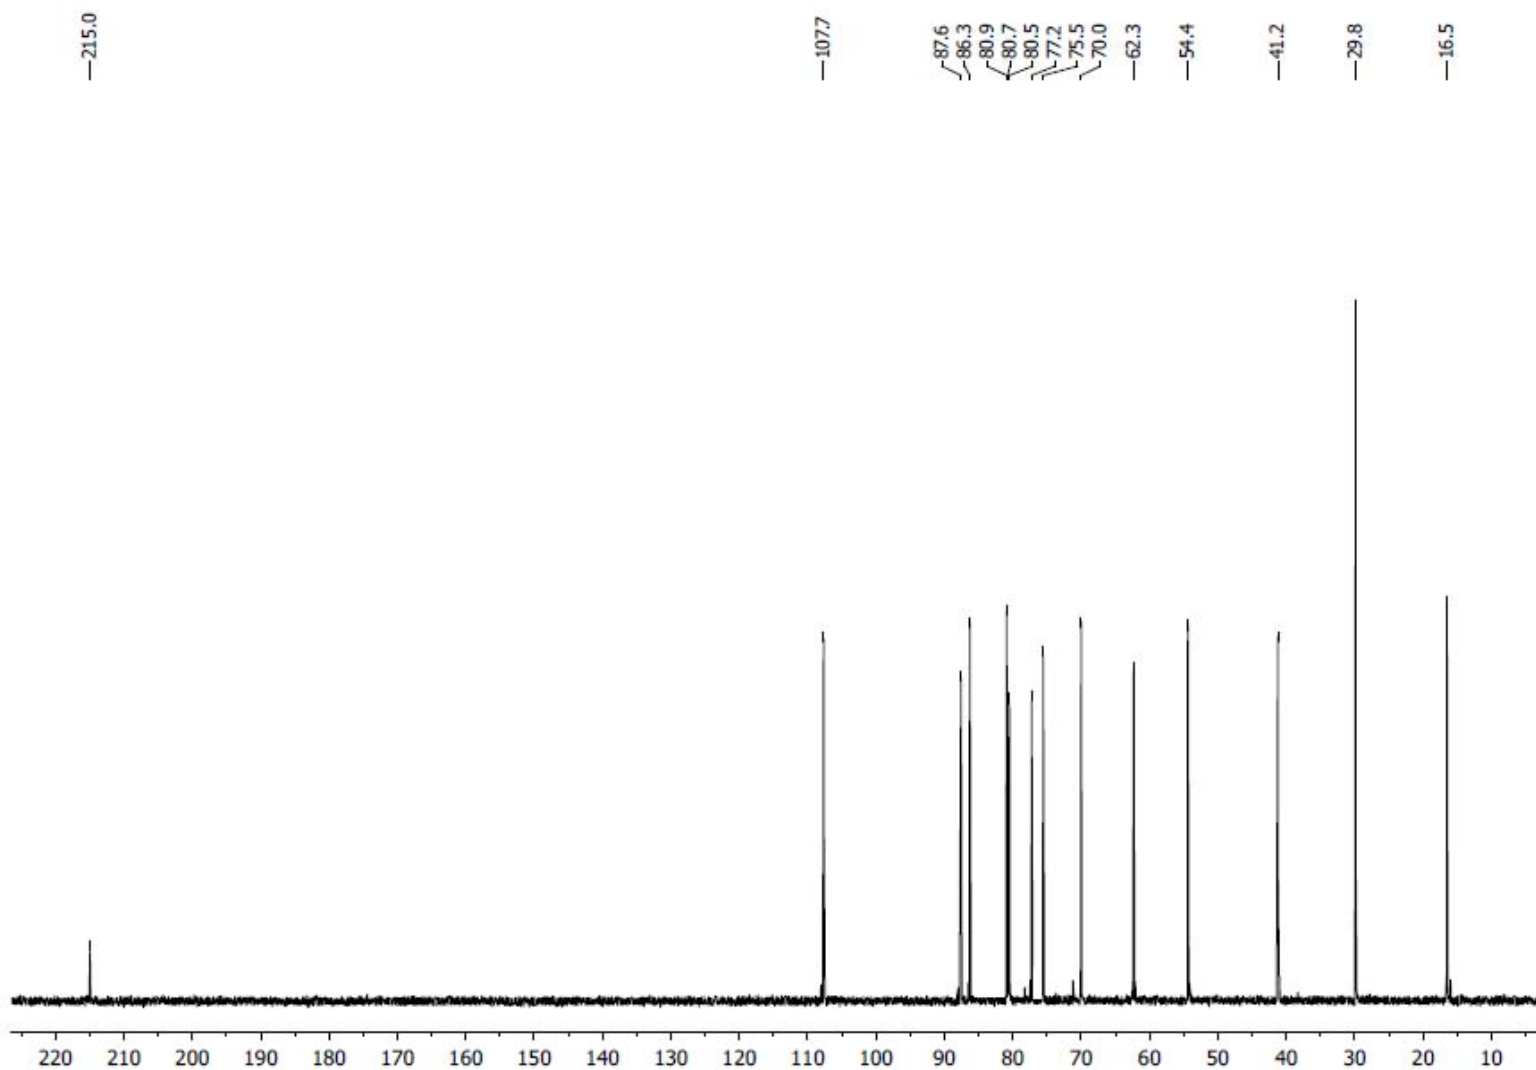

# <sup>1</sup>H RMN of Compound 17

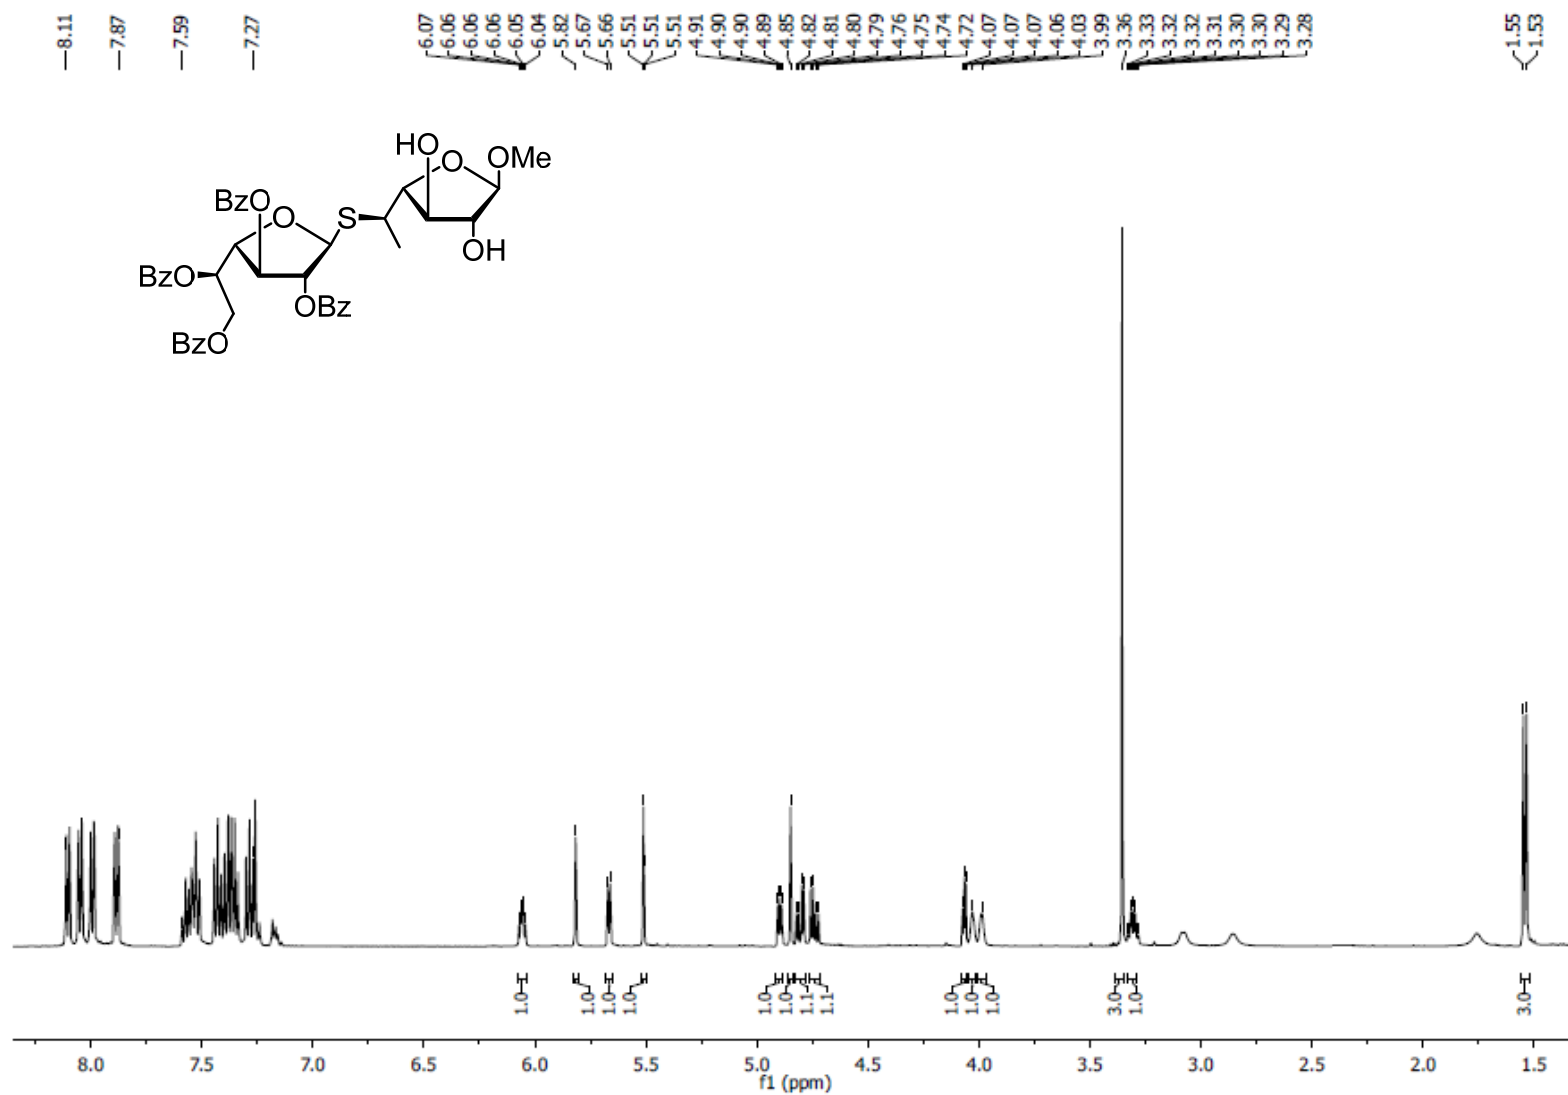

# $^{13}\text{C}$ RMN of Compound 17

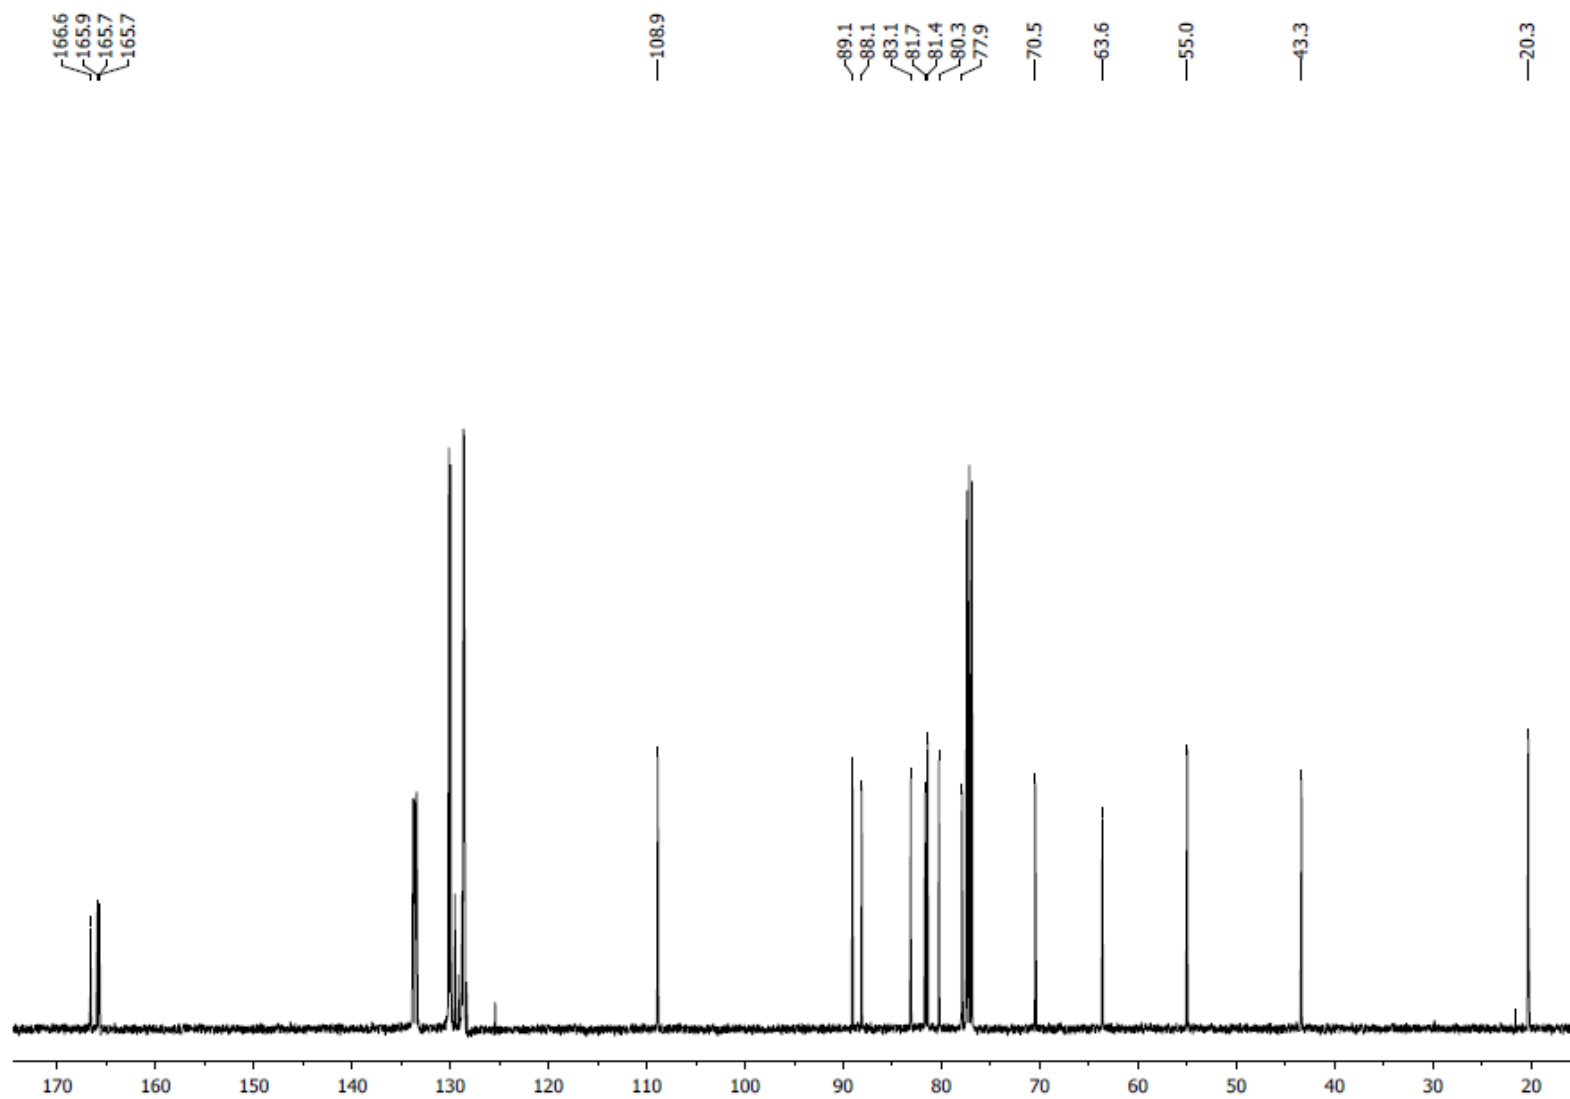

# <sup>1</sup>H RMN of Compound 18

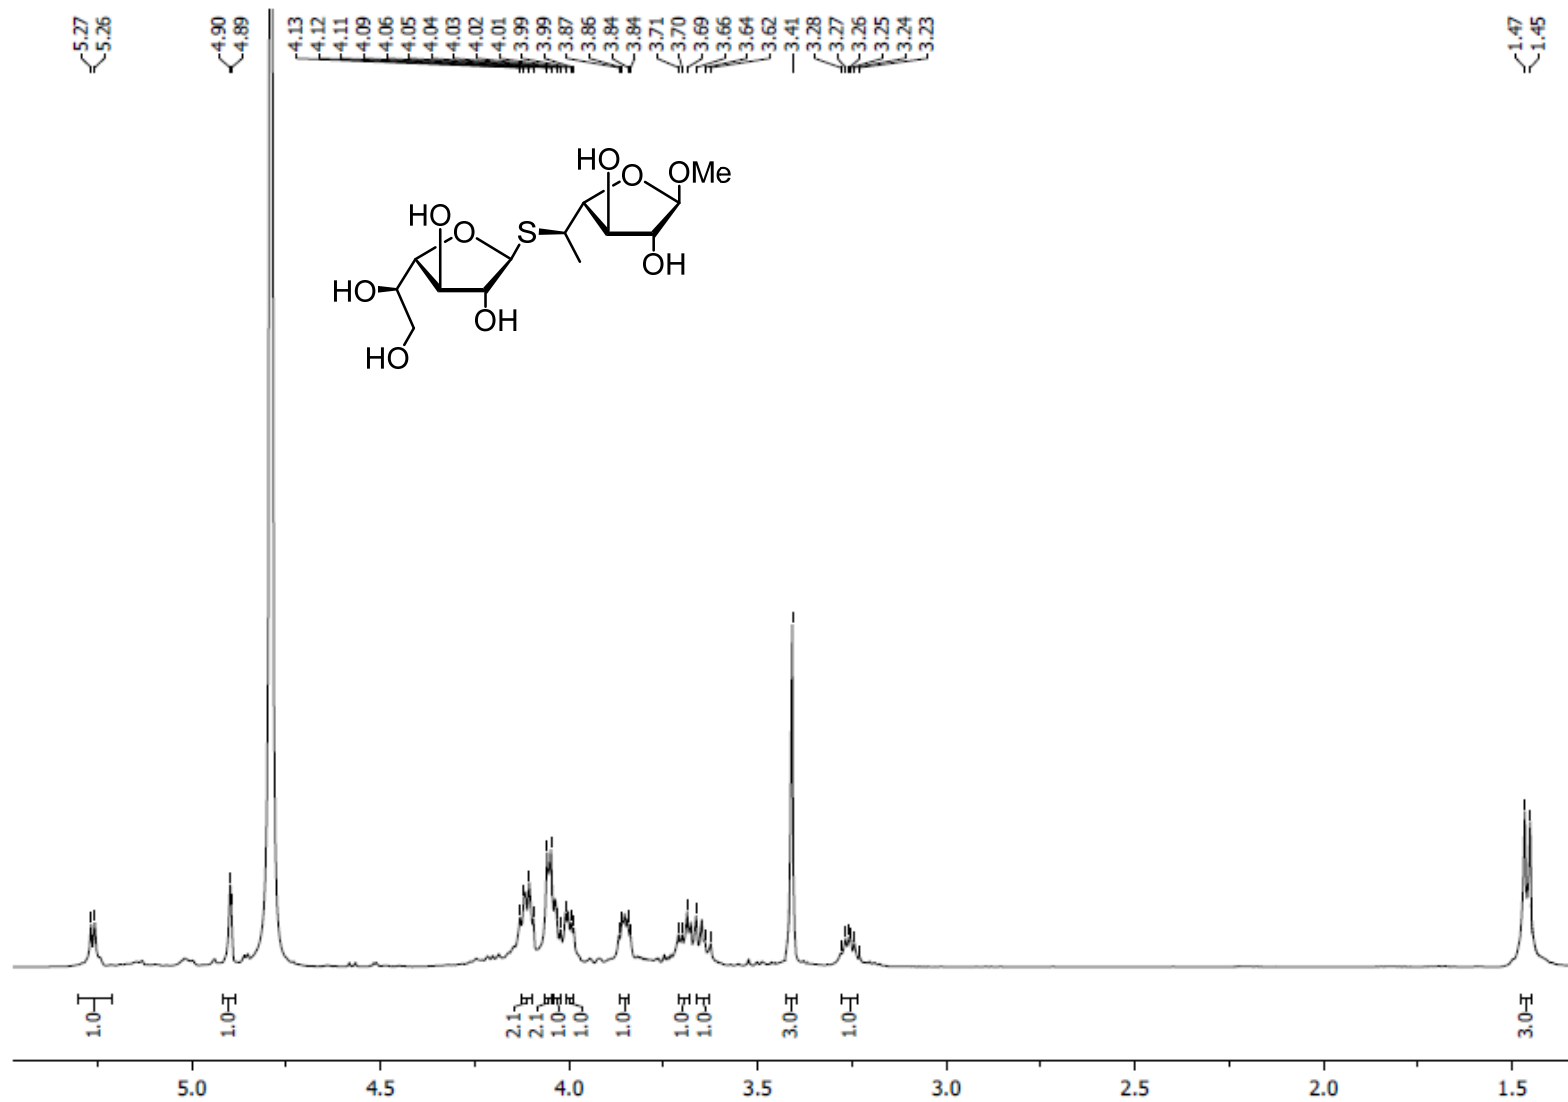

# $^{13}\text{C}$ RMN of Compound 18

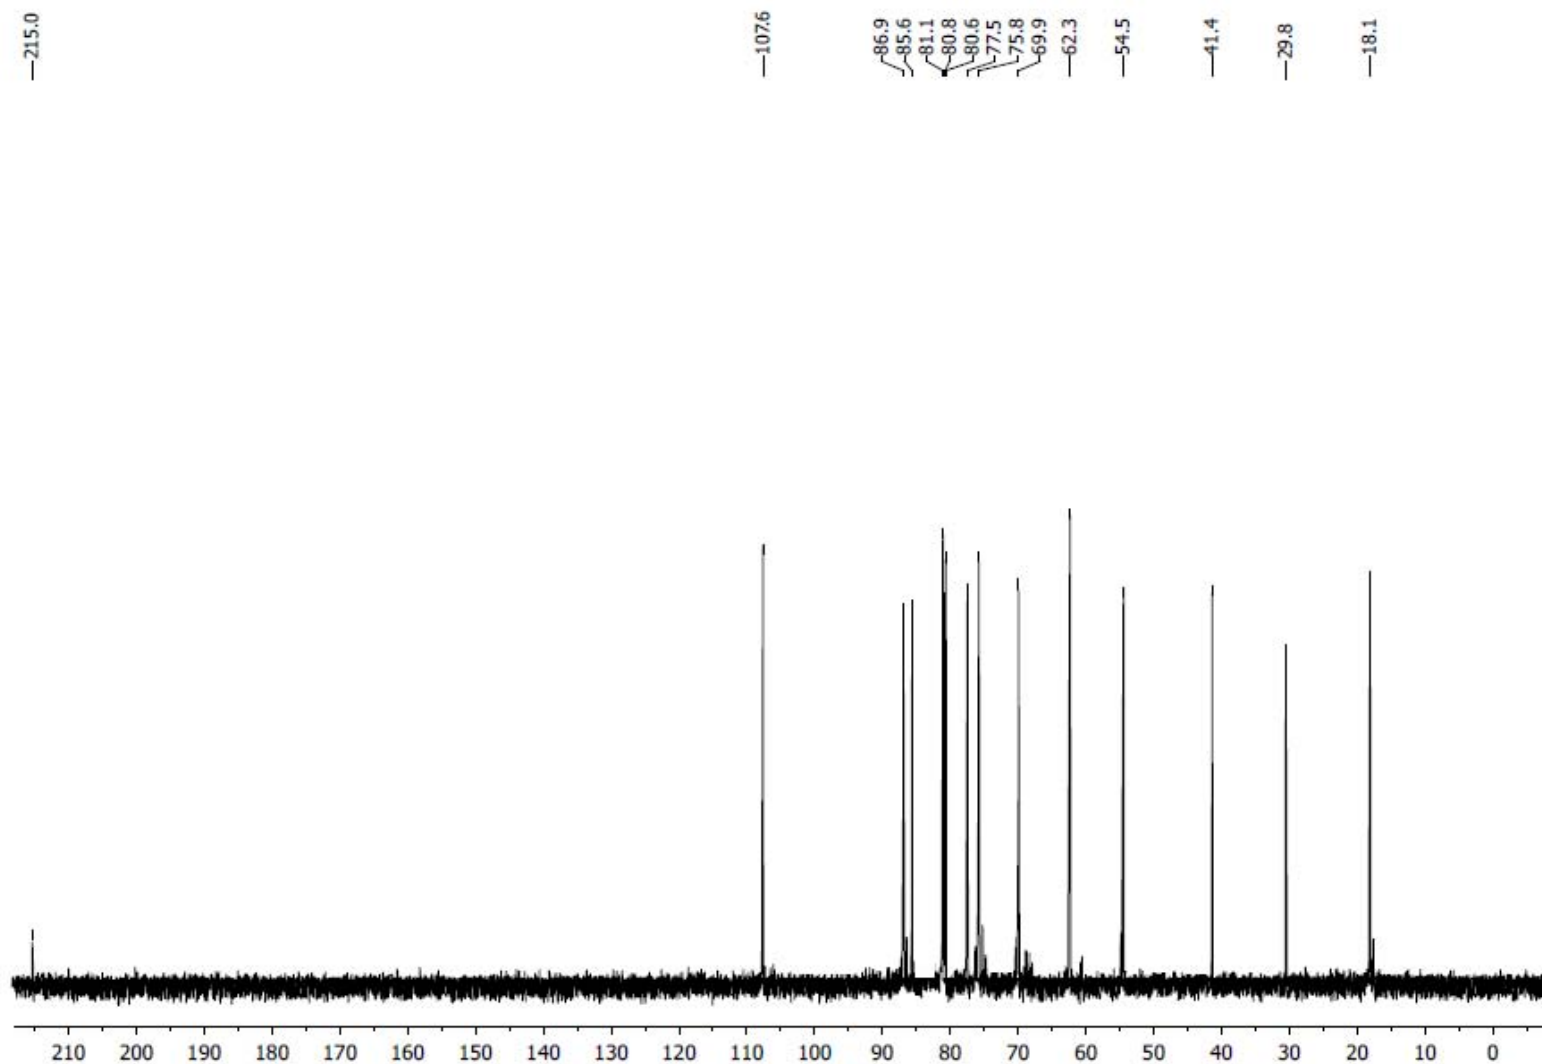

# NOESY of Compound 16

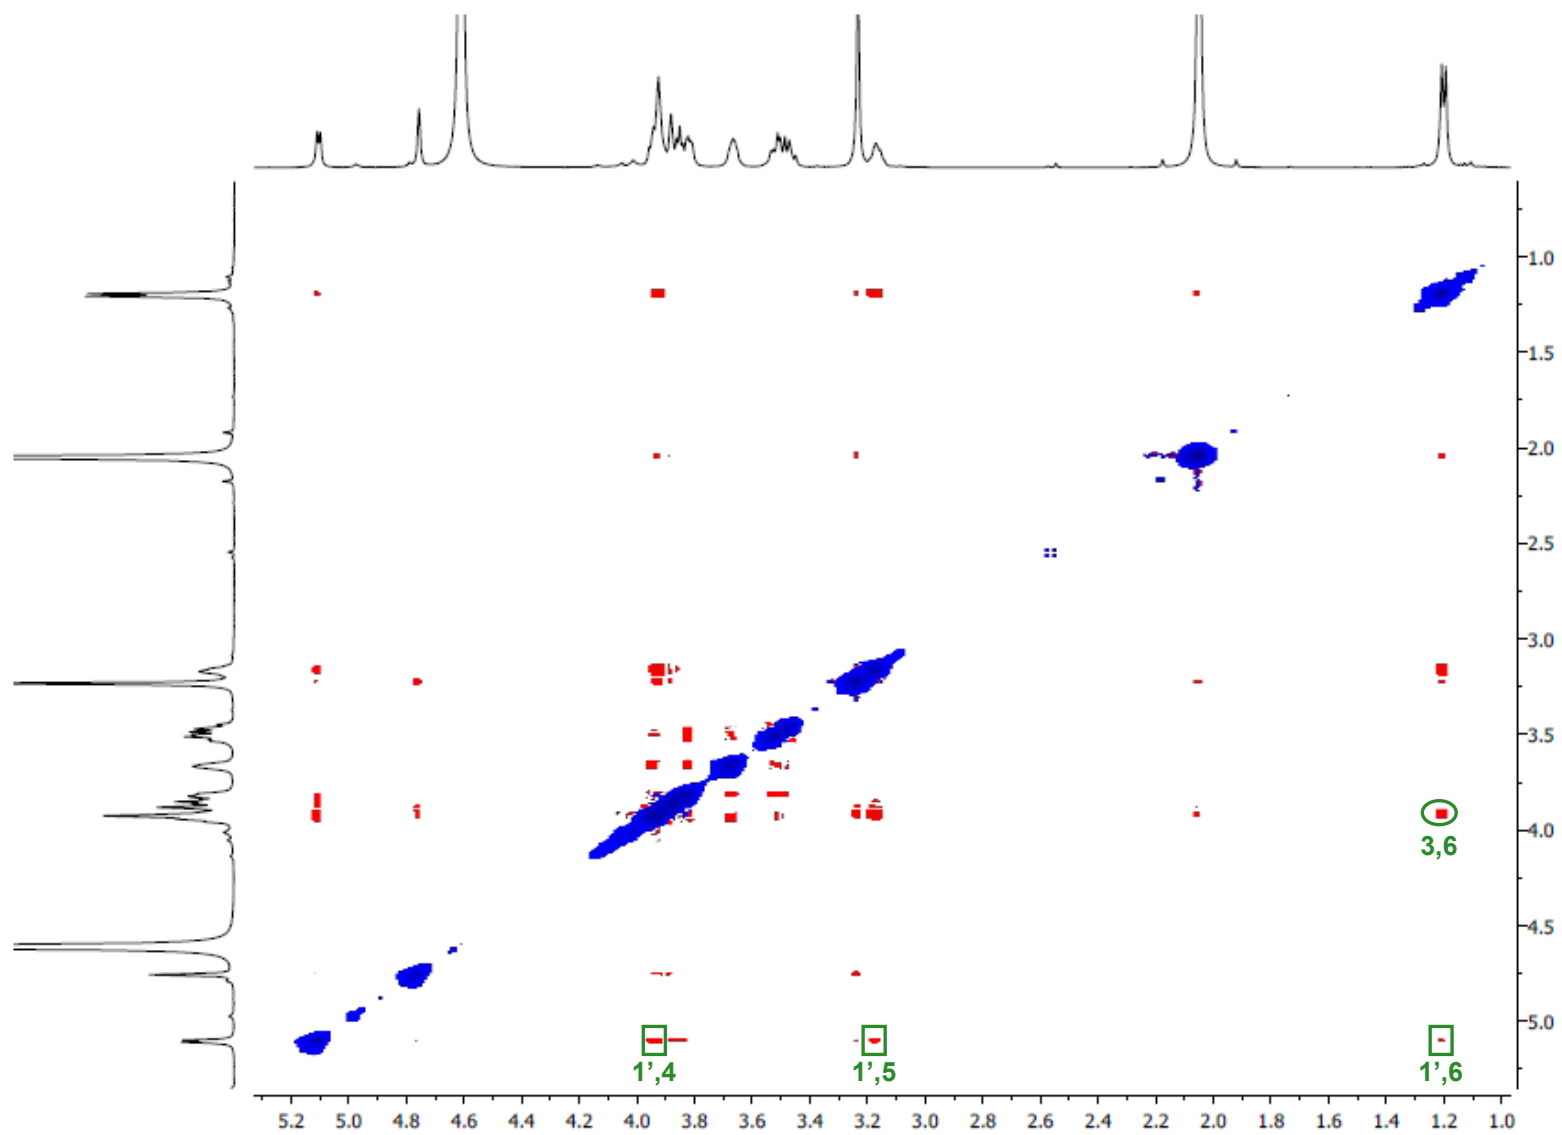



# H1',H4 NOE contact for Compound 16

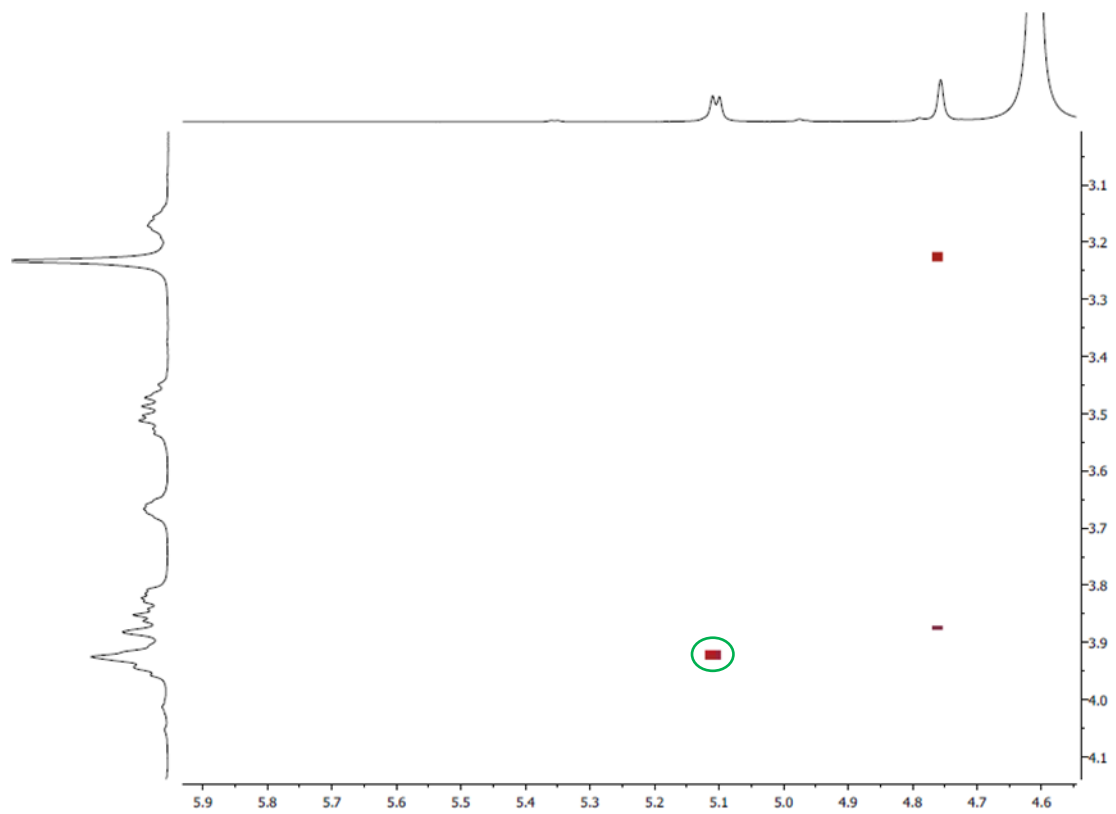

# NOESY of Compound 18

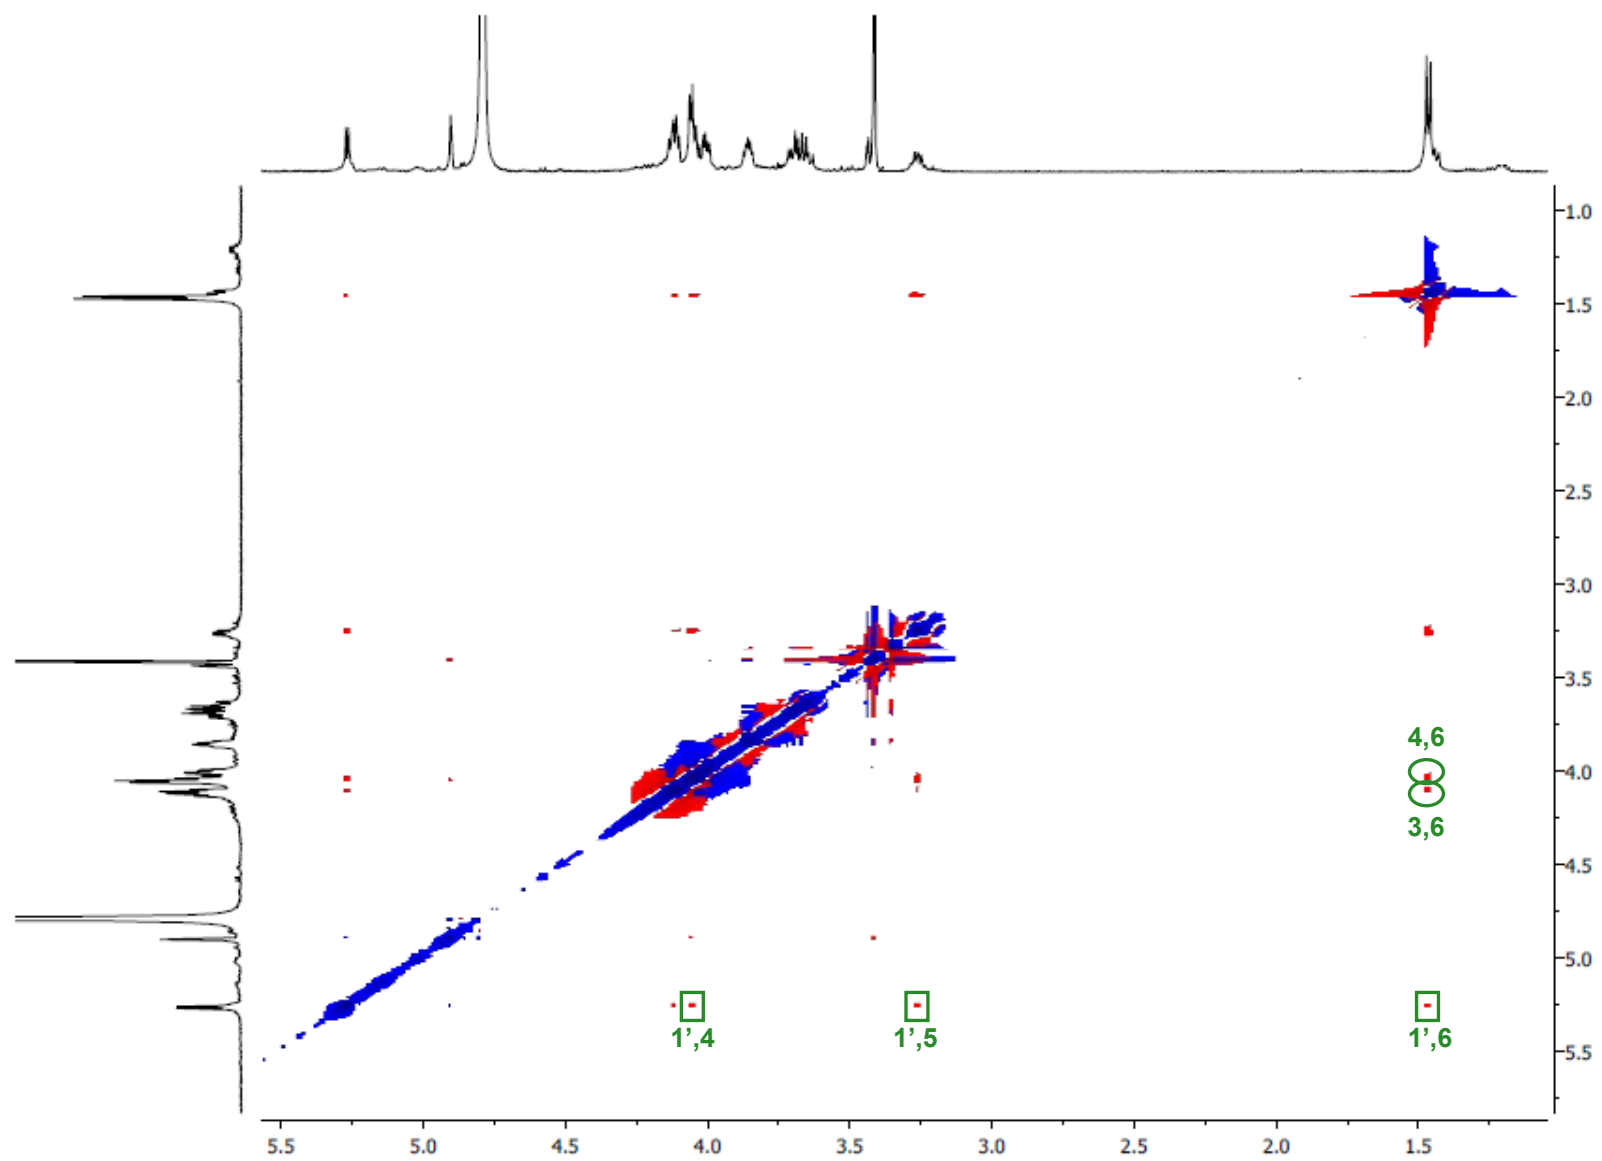

Supplement: c5ra06899a1.pdf [file c5ra06899a1.pdf]
